# Supplementary material
Source: PubMed Central journal article supplement (PMC3137576)
Supplement: supp_ASN.2010080860_Supplemental_Information.pdf [file supp_ASN.2010080860_Supplemental_Information.pdf]

## SUPPLEMENTAL INFORMATION

### Material and Methods

**Primers used for RT-PCRs:** *mGapdh* forward 5'GGTGAAGGTCGGTGTGAA3', reverse 5'GTGTAGTCACGAAGGCATTGA3'; *mNphs1* forward 5'AAAATGTGACCCTTTGCTGC3', reverse 5'CAATGGCCAAGCATAACCAG3'; *mSulf1* forward 5'GGACCTTTGCTGTGTATCTCAA3', reverse 5'CCGAGCCATTCTCGCCATG3'; *mSulf2* forward 5'CATCCGGCCCAACATCATCTT3', reverse 5'GTGTAGTCACGAAGGCATTGA3'; *mWt1* forward 5'GAGAGCCAGCCTACCATCC3', reverse 5'GGGTCCTCGTGTGTTGAAGGAA3'; *mVegfa* forward 5'GAGATGAGGTTCTACAGCAC3', reverse 5'CACCGCCTTGGCTTGTCACAT3'; *hACTN4* forward 5'GAGGCCAGAGGATCGCT3', reverse 5'ACTTGGAGTTGATGATTTGCGG3'; *hCD2AP* forward 5'GAGGAATGTTCCCTGACAAT3', reverse 5'GTCCATAGGTGCTTATTCGT3'; *hGAPDH* forward 5'GGCTCTCCAGAACATCATCCCTGC3', reverse 5'GGGTGTCGCTGTTGAAGTCAGAGG3'; *hNPHS1* forward 5'CAACTGGGAGAGACTGGGAGAA3', reverse 5'AATCTGACAACAAGACGGAGCA3'; *hNPHS2* forward 5'AAGAGTAATTATATTCCGACTGGGACAT3', reverse 5'TGGTCACGATCTCATGAAAAGG3'; *hPODI* forward 5'ATGCGAGTGCTGAGCAAGGCCTTC3', reverse 5'ACCATAAAGGGCCACGTCAGGTTG3'; *hSynpo* forward 5'CCCAAGGTGACCCCGAAT3', reverse 5'CTGCCGCCGCTTCTCA3'; *hWt1* forward 5'CCGGTGCTTCTGGAAACTACCAGGTG3', reverse 5'GGCTGACCTCGGGAATGTTAGACAAGAT3'.

**Antibodies used for immunofluorescence and Western blots:**  $\alpha$ -Actinin4: Dr. Martin Pollak, Brigham and Women's Hospital Boston, MA, USA; Collagen IV  $\alpha$ 4: Dr. Jeffrey Miner, Washington University in St. Louis, MO, USA;  $\alpha$ 3-Integrin: Dr. Jordan Kreidberg, Children's Hospital Boston, MA, USA; Nephtrin: Dr. Lawrence Holzman,

University of Michigan, Ann Arbor, MI, USA and Progen, Heidelberg, Germany; Nidogen: Chemicon; p44/42 MAPK: Cell Signaling Technology, Inc., MA, USA; Phospho-p44/42 MAPK: Cell Signaling Technology, Inc., MA, USA; PECAM: clone MEC 13.3, BD Pharmingen; SULF1 and SULF2: Dr. Xingbin Ai, Boston University, MA, USA; Synaptopodin: Dr. Peter Mundel, University of Miami, Miami, FL, USA;  $\alpha$ -Tubulin: clone DM 1A, Sigma, Saint Louis, MO, USA; VEGFA (A-20): Santa Cruz Biotechnology, Inc., Santa Cruz, CA, USA; Vimentin: clone LN-6, Sigma, Saint Louis, MO, USA; WT1 (C-19): Santa Cruz Biotechnology, Inc., Santa Cruz, CA, USA; Gold-conjugated anti-rabbit (10  $\mu$ m): BioCell, Cardiff, Wales, UK.

**siRNAs and Stealth<sup>TM</sup> RNAi:** *Sulf1*-specific siRNA was directed against the sequence CACAATGTTGGTGGTAAGAAA and *Sulf2* against TGCAACCGGCTTCATAGAATA. As a negative control the “All stars negative control siRNA” (Qiagen) was used. Stealth<sup>TM</sup> RNAi duplexes were synthesized commercially by Invitrogen Life Technologies, Inc. *mWt1* RNAi (5'-CCCAGCUUGAAUGCAUGACCUGGAA-3'), scramble control RNAi (5'-CCCUCGUAAGUACGUCAUCGGAGAA-3').

## Figure Legends

**Figure S1.** Decreased expression of *Sulf1* in *Wt1* +/- mice. By immunofluorescence staining, *Sulf1* protein levels but not *Sulf2* protein levels are decreased in *Wt1* +/- mice. Pictures for the *Wt1*+/+ and *Wt1*+/- mice were taken with the same exposure time. Nidogen served as a control to demonstrate the integrity of the tissue.

**Figure S2.** Characteristics of our newly established murine immortalized podocyte cell line. (A) Morphology of podocytes grown at 33°C or at non-permissive 37°C to induce

differentiation. (B) Immunofluorescence on differentiated podocytes using antibodies against WT1,  $\alpha$ -Tubulin, Vimentin,  $\alpha$ -Actinin4,  $\alpha$ 3-Integrin, Synaptopodin, Nephrin and Phalloidin to detect F-actin. (C) Western blot with anti-WT1 antibody. LB22: murine metanephric mesenchymal cell line, HEK293: human embryonic kidney cell line, Podo: our murine immortalized podocyte cell line. (D) RT-PCR to detect *Nphs1* mRNA. M: marker, NTC: no template control, P33: podocytes grown at 33°C, P37: podocytes grown at 37°C, +RT: cDNA synthesis in presence of RT, -RT: cDNA synthesis in absence of RT.

**Figure S3.** *Sulf1* and *Sulf2* expression in immortalized podocytes. Expression of *Sulf1* and *Sulf2* mRNA detected by RT-PCR in immortalized human and mouse podocytes grown at 33°C or 37°C for 14 days.

**Figure S4.** Immunofluorescence for WT1, Nephrin, Collagen IV  $\alpha$ 4 and PECAM on control kidneys (n=5) and *Sulf1*<sup>-/-</sup>;*Sulf2*<sup>-/-</sup> mutant kidneys (n=5).

**Figure S5.** VEGFA expression in glomeruli and in immortalized podocytes. (A) The VEGF-A antibody used for immunogold staining specifically stains podocytes within the glomerulus and by Western blot (B) detects a single band in total protein extracts. HUVEC: human endothelial cells as a VEGF-A-positive control and HEK293: human embryonic kidney cells as a cell line with low levels of VEGF-A. Podo33 and Podo37: immortalized podocytes grown at either 33°C or 37°C. E18.5: embryonic mouse kidney (day E18.5).

**Figure S6.** VEGFA isoforms expressed in podocytes. (A) Immortalized podocytes cultured at 33°C and 37°C express the three alternative VEGF-A mRNA transcripts encoding VEGF120, 164 and 188. (B) Expression of *Sulf1* and *Sulf2* measured by quantitative RT-PCR 48 hours after transfection of differentiated mouse podocytes with either a scramble siRNA as a control or siRNAs against *Sulf1* or *Sulf2* or both simultaneously. Knockdown experiments were performed independently twice.

**Figure S7.** Disaccharide analysis of heparin sulfate extracted from immortalized podocytes transfected with either a scramble siRNA or siRNAs against *Sulf1* and *Sulf2*. Disaccharides were generated by exhaustive digestion with heparin lyases I, II, and III and subsequently analyzed by SEC LC/MS. Disaccharides were shown in codes adapted from Lawrence *et al.* (14) and aligned along the X axis by increasing levels of sulfation. Specifically, D0S6 and D2S0 are N-sulfated disaccharides and contain one additional sulfate group at 6-*O*- and 2-*O*-positions of glucosamine, respectively; D2S6 represents the trisulfated disaccharide with N-, 2-*O*- and 6-*O*-sulfate groups. All detected ion species that originate from  $\Delta$ -unsaturated disaccharides were summed. The standard deviation was calculated from the relative percentages of each  $\Delta$ -unsaturated disaccharides from triplicate SEC LC/MS runs. Due to detection limit, the saturated disaccharides, which reside on the non-reducing end of the HS chain, were not counted.

**Figure S8.** *Vegfa* expression in *Sulf* knockdown podocytes. Top panels: qRT-PCR for *Sulf1* and *Sulf2* after knockdown using siRNA. Lower left panel: qRT-PCR for *Vegfa* after knockdown of *Sulf2* and *Sulf1*. Lower right panel: VEGFA protein levels measured

by Western blot after knockdown of *Sulf2* and *Sulf2*. This experiment was done in duplicates. *Error bars*:  $\pm$ SEM.

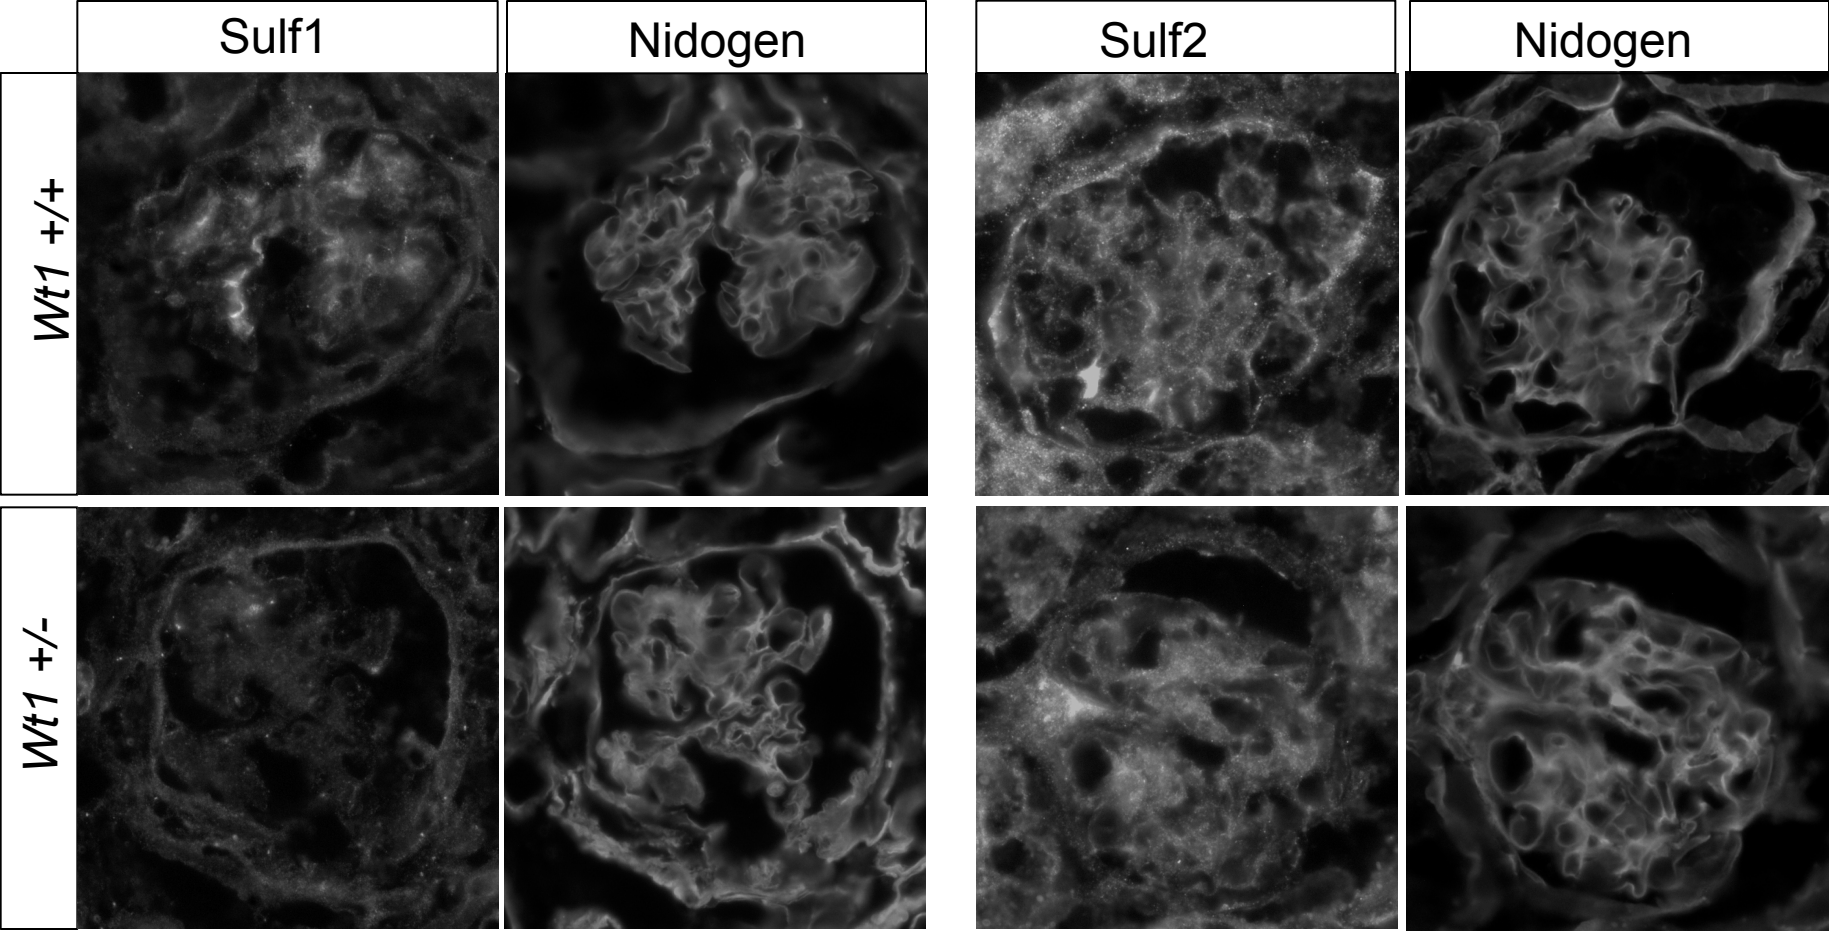

Figure S1

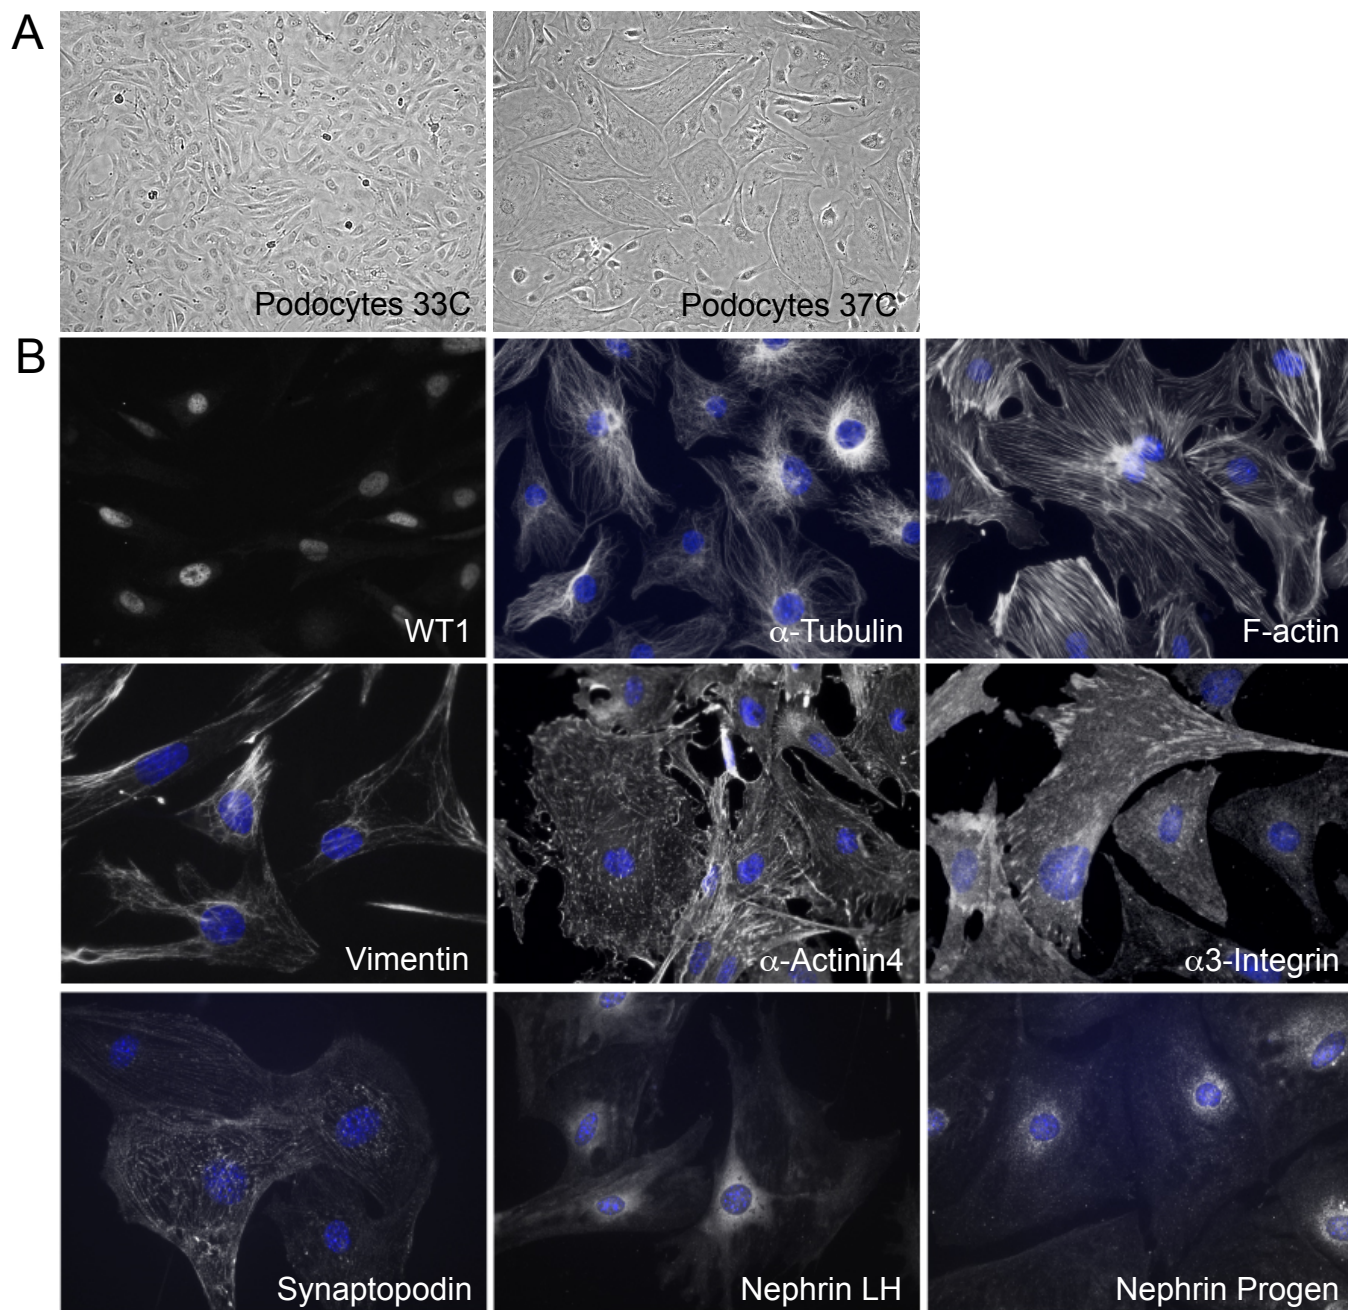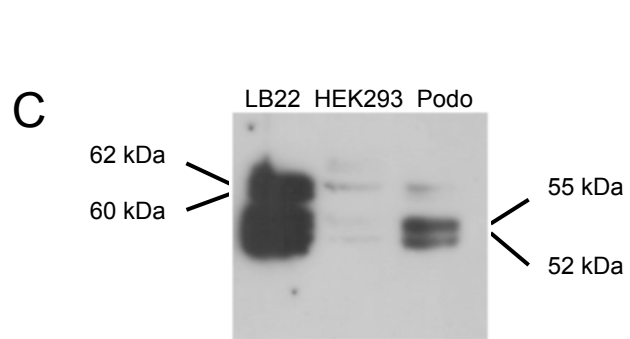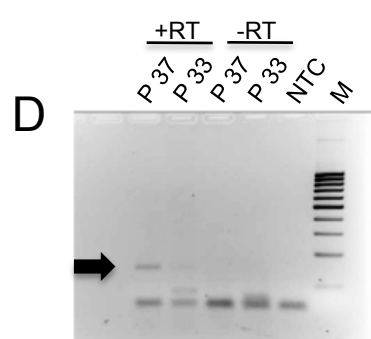

Figure S2

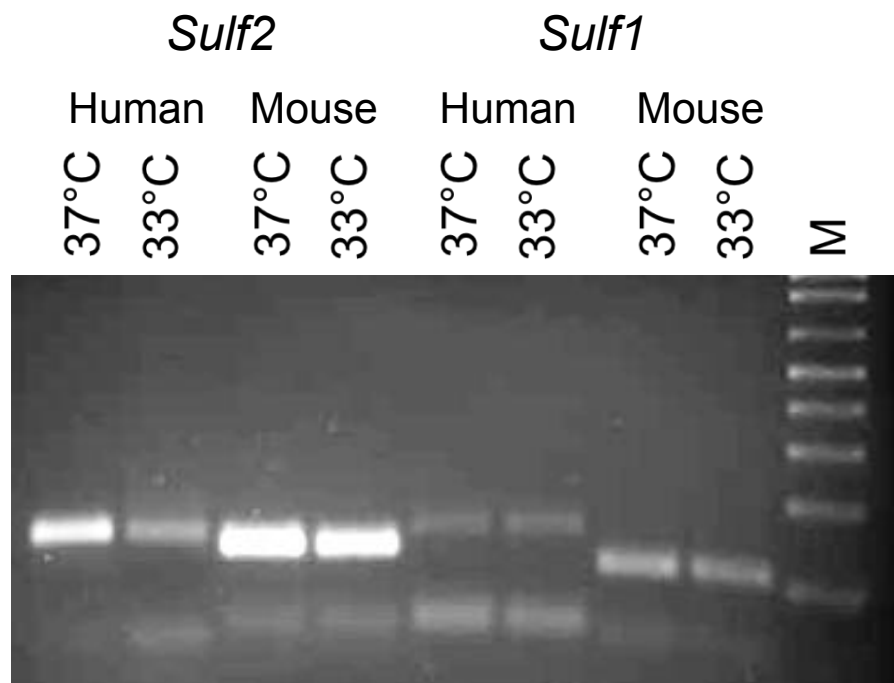

Figure S3



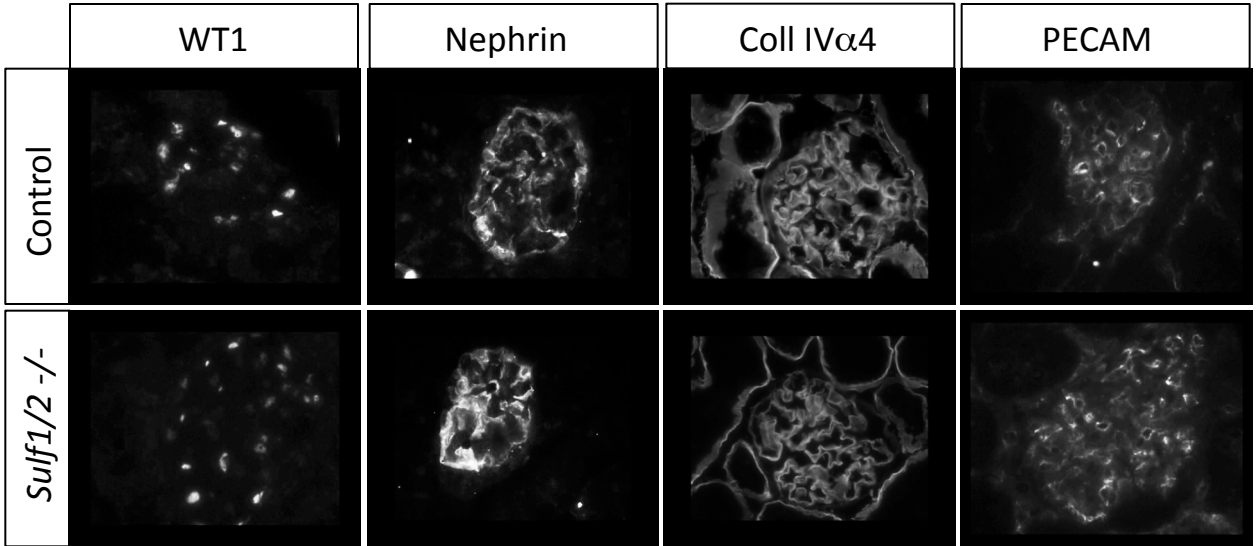

Figure S4

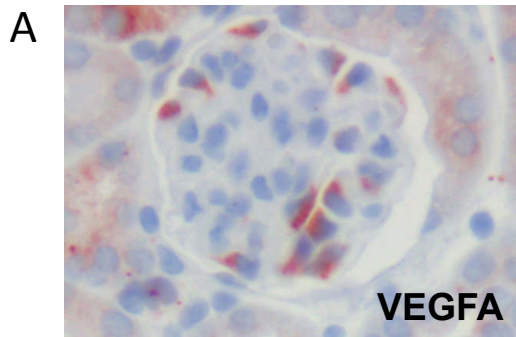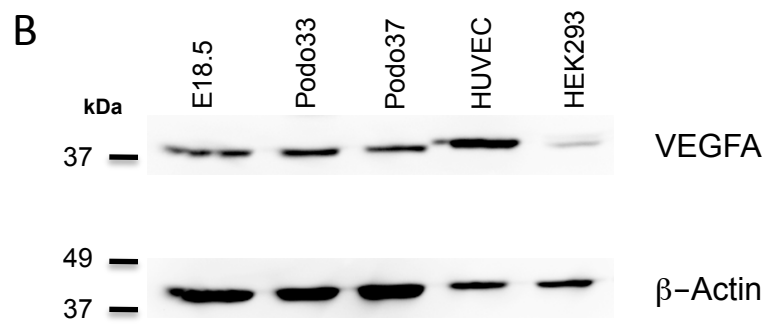

Figure S5

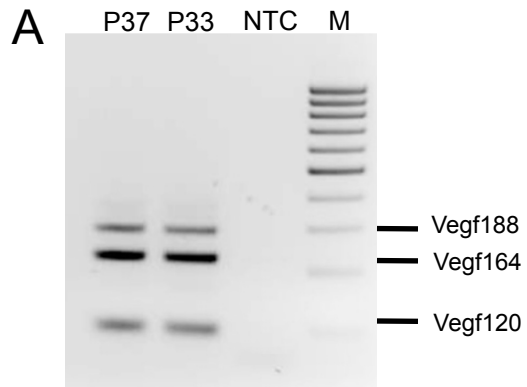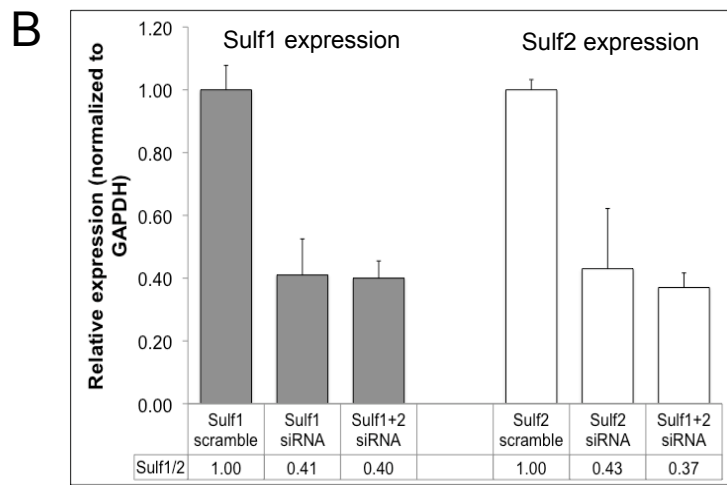

Figure S6

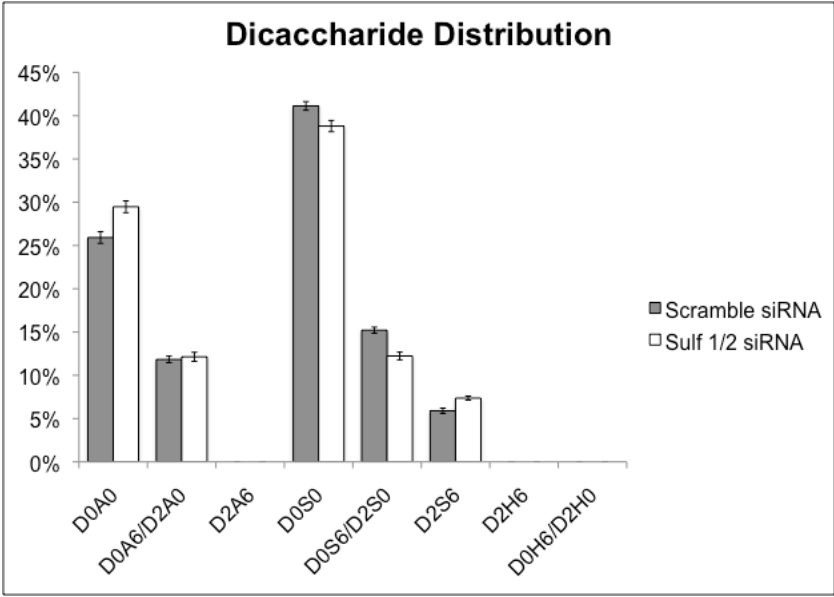

Figure S7

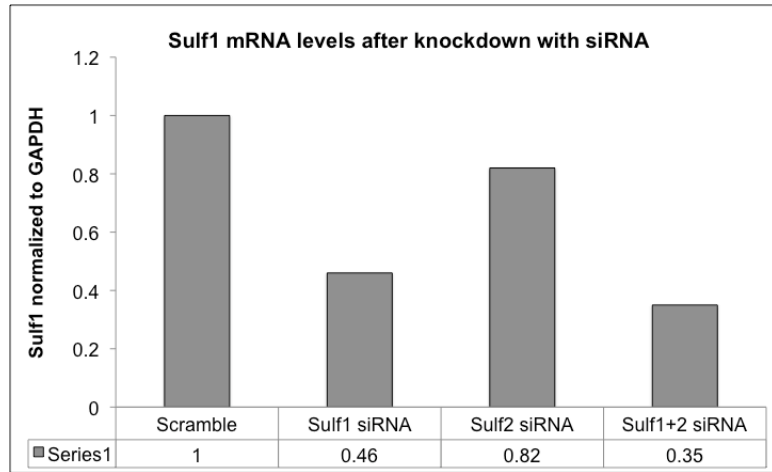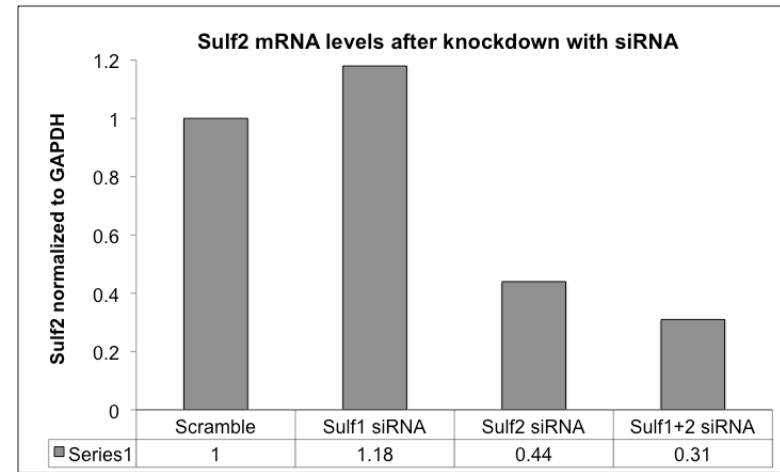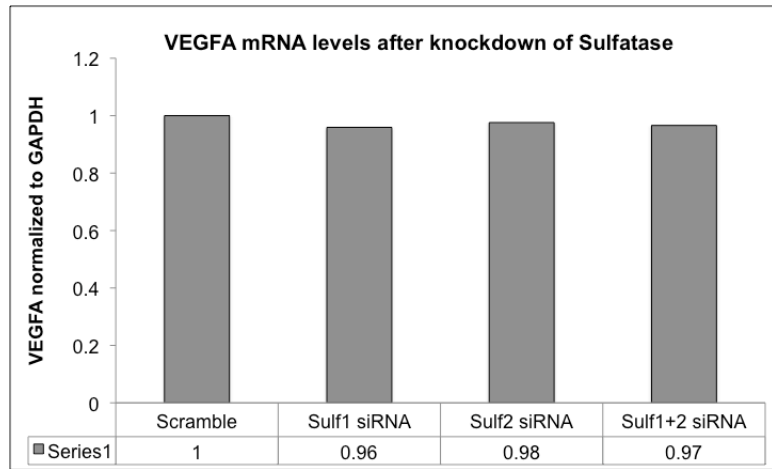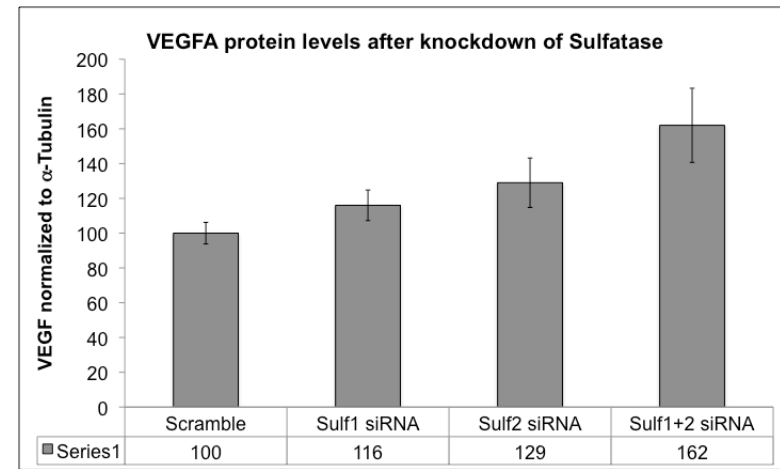

Figure S8

**Table S1:** Clinical and mutational data of patients and controls and characteristics of the primary human podocyte cell cultures

|                         | <b>DDS1<br/>(NS18)</b> | <b>DDS2<br/>(NS21)</b> | <b>DDS3</b> | <b>Control<br/>child</b> | <b>Control<br/>adult</b> |
|-------------------------|------------------------|------------------------|-------------|--------------------------|--------------------------|
| <b>Age at Nx (mo)</b>   | 9                      | 21                     | 13          | 84                       | n/n                      |
| <b>Indication</b>       | DDS                    | DDS                    | DDS         | Wilms' tumor             | Tumor<br>nephrectomy     |
| <b>WT1 mutation</b>     | Arg366His              | Cys388Arg              | Arg394Trp   | ---                      |                          |
| <b>RT-PCR</b>           |                        |                        |             |                          |                          |
| <i>WT1</i>              | +                      | +                      | +           | +                        | +                        |
| <i>Synpo</i>            | +                      | +                      | +           | +                        | +                        |
| <i>POD-1</i>            | +                      | +                      | +           | +                        | +                        |
| <i>NPHS1</i>            | +                      | +                      | +           | +                        | +                        |
| <i>NPHS2</i>            | +                      | +                      | +           | +                        | +                        |
| <i>ACTN4</i>            | +                      | +                      | n/a         | n/a                      | +                        |
| <i>CD2AP</i>            | +                      | +                      | n/a         | n/a                      | +                        |
| <b>Expression array</b> |                        |                        |             |                          |                          |
| <i>WT1</i>              | +                      | +                      | +           | +                        | +                        |
| <i>Synpo</i>            | +                      | +                      | +           | +                        | +                        |
| <i>NPHS1</i>            | +                      | +                      | +           | +                        | +                        |
| <i>NPHS2</i>            | +                      | +                      | +           | +                        | +                        |
| <i>ACTN4</i>            | +                      | +                      | +           | +                        | +                        |
| <i>CD2AP</i>            | +                      | +                      | +           | +                        | +                        |

NS18, NS21 refer to the patients described in Schumacher et al, 2007. Nx: nephrectomy; Synpo: Synaptopodin; n/n: not known; n/a: not analyzed because we ran out of material.

**Table S2:** Genes differentially expressed between *Wt1* mutant and control samples

| Probe Set<br>Mouse Array | Gene Symbol | p-value  | Fold change<br>Het/WT | Probe Set<br>Human Array | p-value  | Fold change<br>DDS/Control |
|--------------------------|-------------|----------|-----------------------|--------------------------|----------|----------------------------|
| 1455494_at               | Col1a1      | 1.78E-02 | 5.73                  |                          |          |                            |
| 1433715_at               | Cpne7       | 1.09E-02 | 4.00                  |                          |          |                            |
| 1435418_at               | Slc22a8     | 3.00E-02 | 3.99                  |                          |          |                            |
| 1416342_at               | Tnc         | 1.10E-02 | 3.85                  |                          |          |                            |
| 1422789_at               | Aldh1a2     | 4.78E-02 | 3.52                  |                          |          |                            |
| 1427883_a_at             | Col3a1      | 2.95E-02 | 3.49                  |                          |          |                            |
| 1428572_at               | Basp1       | 1.86E-02 | 3.40                  |                          |          |                            |
| 1416271_at               | Perp        | 1.45E-02 | 3.35                  |                          |          |                            |
| 1450757_at               | Cdh11       | 1.27E-04 | 3.29                  |                          |          |                            |
| 1418866_at               | Cyp24a1     | 1.85E-02 | 3.27                  |                          |          |                            |
| 1449494_at               | Rab3c       | 6.38E-05 | 3.11                  | n/p                      |          |                            |
| 1416658_at               | Frzb        | 3.70E-03 | 2.97                  |                          |          |                            |
| 1423037_at               | Aplnr       | 6.24E-04 | 2.91                  |                          |          |                            |
| 1420992_at               | Ankrd1      | 2.78E-02 | 2.85                  |                          |          |                            |
| 1417378_at               | Cadm1       | 5.61E-03 | 2.83                  |                          |          |                            |
| 1424525_at               | Grp         | 3.35E-02 | 2.83                  |                          |          |                            |
| 1439109_at               | Ccdc68      | 3.46E-04 | 2.73                  |                          |          |                            |
| 1456264_at               | Commd7      | 1.83E-02 | 2.73                  | n/p                      |          |                            |
| 1418090_at               | Plvap       | 1.58E-04 | 2.73                  |                          |          |                            |
| 1423774_a_at             | Prc1        | 2.01E-02 | 2.71                  |                          |          |                            |
| 1450047_at               | Hs6st2      | 3.91E-02 | 2.66                  | n/p                      |          |                            |
| 1450648_s_at             | H2-Ab1      | 3.78E-02 | 2.66                  | n/p                      |          |                            |
| 1449368_at               | Dcn         | 2.75E-02 | 2.65                  |                          |          |                            |
| 1448594_at               | Wisp1       | 1.99E-03 | 2.64                  |                          |          |                            |
| 1424278_a_at             | Birc5       | 5.94E-03 | 2.59                  |                          |          |                            |
| 1440955_at               | Kcp         | 3.51E-02 | 2.53                  | n/p                      |          |                            |
| 1448194_a_at             | H19         | 4.40E-02 | 2.48                  | n/p                      |          |                            |
| 1435792_at               | Csprs       | 2.57E-03 | 2.48                  | n/p                      |          |                            |
| 1435370_a_at             | Ces3        | 3.36E-02 | 2.44                  |                          |          |                            |
| 1457058_at               | Adamts2     | 2.77E-02 | 2.41                  |                          |          |                            |
| 1454694_a_at             | Top2a       | 4.82E-02 | 2.39                  |                          |          |                            |
| 1418726_a_at             | Tnnt2       | 4.24E-02 | 2.31                  |                          |          |                            |
| 1427537_at               | Eppk1       | 1.68E-02 | 2.31                  |                          |          |                            |
| 1448205_at               | Ccnb1       | 1.09E-02 | 2.29                  |                          |          |                            |
| 1456144_at               | Nav3        | 7.36E-03 | 2.27                  |                          |          |                            |
| 1453022_at               | Gpihbp1     | 3.88E-02 | 2.27                  | n/p                      |          |                            |
| 1449863_a_at             | Dlx5        | 1.76E-02 | 2.27                  |                          |          |                            |
| 1434465_x_at             | Vldlr       | 4.16E-02 | 2.27                  | 209822_s_at              | 2.79E-02 | 1.75                       |
| 1448314_at               | Cdc2a       | 2.07E-02 | 2.26                  | n/p                      |          |                            |
| 1424451_at               | Acaa1b      | 4.20E-02 | 2.23                  | n/p                      |          |                            |
| 1416612_at               | Cyp1b1      | 4.88E-03 | 2.23                  |                          |          |                            |
| 1434437_x_at             | Rrm2        | 1.13E-04 | 2.22                  |                          |          |                            |
| 1420838_at               | Ntrk2       | 2.90E-02 | 2.21                  |                          |          |                            |
| 1449152_at               | Cdkn2b      | 5.13E-03 | 2.18                  |                          |          |                            |
| 1424853_s_at             | Cyp4a10     | 3.94E-02 | 2.16                  | n/p                      |          |                            |
| 1426278_at               | Ifi2712a    | 3.50E-02 | 2.15                  | n/p                      |          |                            |
| 1457266_at               | Slc38a6     | 1.71E-02 | 2.14                  |                          |          |                            |
| 1436134_at               | Scn2b       | 1.37E-02 | 2.11                  |                          |          |                            |
| 1430130_at               | Vvce        | 3.48E-02 | 2.11                  | n/p                      |          |                            |
| 1415949_at               | Cpe         | 2.07E-03 | 2.11                  |                          |          |                            |
| 1449740_s_at             | Dsg2        | 3.81E-02 | 2.11                  |                          |          |                            |
| 1459318_at               | Sema6d      | 4.78E-02 | 2.11                  |                          |          |                            |
| 1429111_at               | Tln2        | 4.55E-02 | 2.09                  |                          |          |                            |
| 1452981_at               | Cntn1       | 1.94E-02 | 2.08                  |                          |          |                            |
| 1436920_at               | Pcdh17      | 6.23E-03 | 2.08                  |                          |          |                            |
| 1421477_at               | Cplx2       | 1.03E-02 | 2.07                  |                          |          |                            |
| 1435290_x_at             | H2-Aa       | 3.23E-02 | 2.07                  | n/p                      |          |                            |
| 1429051_s_at             | Sox11       | 1.65E-02 | 2.06                  | 204914_s_at              | 3.48E-03 | 1.57                       |
| 1449151_at               | Pctk3       | 2.25E-02 | 2.05                  |                          |          |                            |
| 1439827_at               | Adamts12    | 1.67E-03 | 2.04                  |                          |          |                            |
| 1453102_at               | Flrt3       | 3.58E-02 | 2.03                  | 219250_s_at              | 2.42E-02 | 2.06                       |
| 1457434_s_at             | Ptpla       | 1.20E-02 | 2.03                  |                          |          |                            |
| 1421009_at               | Rsad2       | 2.81E-05 | 2.02                  |                          |          |                            |
| 1419692_a_at             | Ltc4s       | 8.26E-03 | 2.01                  |                          |          |                            |
| 1451453_at               | Dapk2       | 3.26E-02 | 1.99                  |                          |          |                            |
| 1444073_at               | Maf         | 4.28E-02 | 1.98                  |                          |          |                            |
| 1434728_at               | Gria3       | 4.54E-02 | 1.98                  |                          |          |                            |
| 1418294_at               | Epb4.1l4b   | 3.34E-02 | 1.97                  | n/p                      |          |                            |

| Probe Set<br>Mouse Array | Gene Symbol | p-value  | Fold change<br>Het/WT | Probe Set<br>Human Array | p-value  | Fold change<br>DDS/Control |
|--------------------------|-------------|----------|-----------------------|--------------------------|----------|----------------------------|
| 1426511_at               | Susd2       | 7.41E-03 | 1.96                  | n/p                      |          |                            |
| 1417928_at               | Pdlim4      | 4.32E-02 | 1.96                  |                          |          |                            |
| 1421712_at               | Sele        | 3.47E-02 | 1.95                  |                          |          |                            |
| 1426642_at               | Fn1         | 4.59E-02 | 1.94                  |                          |          |                            |
| 1416321_s_at             | Prelp       | 2.13E-02 | 1.94                  |                          |          |                            |
| 1455393_at               | Cp          | 1.44E-02 | 1.94                  |                          |          |                            |
| 1454926_at               | Sphkap      | 4.84E-02 | 1.93                  | n/p                      |          |                            |
| 1419675_at               | Ngf         | 7.31E-04 | 1.93                  | 206814_at                | 2.90E-04 | 2.28                       |
| 1450652_at               | Ctsk        | 4.43E-02 | 1.92                  |                          |          |                            |
| 1416136_at               | Mmp2        | 2.52E-02 | 1.92                  |                          |          |                            |
| 1436236_x_at             | Cotl1       | 4.86E-02 | 1.91                  |                          |          |                            |
| 1417130_s_at             | Angptl4     | 4.18E-02 | 1.91                  |                          |          |                            |
| 1419518_at               | Tuba8       | 2.59E-02 | 1.90                  |                          |          |                            |
| 1452464_a_at             | Metap11     | 1.34E-02 | 1.90                  | n/p                      |          |                            |
| 1437785_at               | Adamts9     | 1.92E-03 | 1.90                  |                          |          |                            |
| 1424882_a_at             | Nt5dc2      | 1.11E-02 | 1.89                  | 218051_s_at              | 1.82E-02 | 2.00                       |
| 1428758_at               | Tmem86a     | 4.00E-02 | 1.88                  | n/p                      |          |                            |
| 1418440_at               | Col8a1      | 1.31E-03 | 1.87                  |                          |          |                            |
| 1431057_a_at             | Prss23      | 2.57E-02 | 1.87                  |                          |          |                            |
| 1430811_a_at             | Nuf2        | 8.10E-03 | 1.87                  | n/p                      |          |                            |
| 1438009_at               | Hist1h2ad   | 2.98E-02 | 1.85                  |                          |          |                            |
| 1460412_at               | Fbln7       | 2.51E-02 | 1.85                  | n/p                      |          |                            |
| 1421032_a_at             | Dnajb12     | 3.37E-02 | 1.85                  |                          |          |                            |
| 1416854_at               | Slc34a2     | 2.97E-03 | 1.84                  | 204124_at                | 1.78E-02 | 1.54                       |
| 1416178_a_at             | Plekhb1     | 4.90E-02 | 1.83                  |                          |          |                            |
| 1433947_at               | Rab37       | 3.74E-02 | 1.83                  | n/p                      |          |                            |
| 1429014_at               | Ankzf1      | 4.18E-02 | 1.82                  |                          |          |                            |
| 1449865_at               | Sema3a      | 4.16E-02 | 1.82                  |                          |          |                            |
| 1456137_at               | Nrxn3       | 3.81E-03 | 1.81                  |                          |          |                            |
| 1419687_at               | MacroD1     | 3.49E-02 | 1.79                  |                          |          |                            |
| 1439049_at               | Dph5        | 3.54E-03 | 1.79                  |                          |          |                            |
| 1424671_at               | Plekhhf1    | 3.54E-02 | 1.79                  |                          |          |                            |
| 1452881_at               | Gins2       | 2.23E-02 | 1.79                  |                          |          |                            |
| 1437240_at               | Pgm2        | 2.33E-02 | 1.78                  | n/p                      |          |                            |
| 1429443_at               | Cpne4       | 4.48E-02 | 1.78                  | n/p                      |          |                            |
| 1419393_at               | Abcg5       | 3.80E-02 | 1.77                  |                          |          |                            |
| 1430047_at               | Ankrd32     | 3.49E-02 | 1.77                  | n/p                      |          |                            |
| 1449141_at               | Fblim1      | 1.01E-03 | 1.77                  | n/p                      |          |                            |
| 1424051_at               | Col4a2      | 8.99E-03 | 1.76                  |                          |          |                            |
| 1436313_at               | Scyl2       | 2.05E-02 | 1.76                  |                          |          |                            |
| 1451038_at               | Apln        | 4.34E-04 | 1.76                  | n/p                      |          |                            |
| 1418086_at               | Ppp1r14a    | 3.61E-02 | 1.75                  | n/p                      |          |                            |
| 1434748_at               | Ckap2       | 4.73E-02 | 1.75                  |                          |          |                            |
| 1437698_at               | Myo5b       | 4.20E-02 | 1.75                  | n/p                      |          |                            |
| 1416258_at               | Tk1         | 3.90E-02 | 1.74                  |                          |          |                            |
| 1455154_at               | Gli3        | 5.25E-03 | 1.74                  |                          |          |                            |
| 1429856_at               | Tspan18     | 1.13E-02 | 1.73                  | n/p                      |          |                            |
| 1429171_a_at             | Ncapg       | 4.77E-02 | 1.73                  |                          |          |                            |
| 1441315_s_at             | Slc19a2     | 3.23E-02 | 1.72                  |                          |          |                            |
| 1436513_at               | Tanc2       | 2.01E-02 | 1.72                  |                          |          |                            |
| 1437932_a_at             | Cldn1       | 4.10E-02 | 1.72                  |                          |          |                            |
| 1436480_at               | Dpp7        | 4.84E-02 | 1.72                  | n/p                      |          |                            |
| 1450584_at               | Hoxd11      | 2.10E-02 | 1.72                  |                          |          |                            |
| 1423748_at               | Pdk1        | 1.77E-02 | 1.72                  | 206686_at                | 2.52E-02 | 1.95                       |
| 1419906_at               | Hpgd        | 4.53E-02 | 1.71                  |                          |          |                            |
| 1456475_s_at             | Prkar2b     | 5.65E-03 | 1.71                  |                          |          |                            |
| 1417894_at               | Gpr97       | 1.78E-02 | 1.70                  |                          |          |                            |
| 1429273_at               | Bmper       | 4.92E-03 | 1.70                  | n/p                      |          |                            |
| 1452035_at               | Col4a1      | 1.65E-02 | 1.70                  | 211981_at                | 2.73E-02 | 2.32                       |
| 1438217_at               | A2bp1       | 2.88E-02 | 1.70                  |                          |          |                            |
| 1423557_at               | Ifngr2      | 3.48E-02 | 1.69                  | 201642_at                | 3.50E-02 | 1.69                       |
| 1457433_x_at             | Zfp120      | 3.62E-02 | 1.69                  | n/p                      |          |                            |
| 1422545_at               | Tbx2        | 3.27E-02 | 1.69                  |                          |          |                            |
| 1417160_s_at             | Expi        | 4.85E-02 | 1.69                  | n/p                      |          |                            |
| 1423344_at               | Epor        | 4.33E-02 | 1.69                  |                          |          |                            |
| 1436617_at               | Cetn4       | 2.83E-02 | 1.69                  | n/p                      |          |                            |
| 1436002_at               | Scube3      | 3.54E-02 | 1.69                  |                          |          |                            |
| 1428744_s_at             | Bri3bp      | 3.61E-02 | 1.69                  | n/p                      |          |                            |
| 1419933_at               | Pdrg1       | 1.84E-02 | 1.68                  | n/p                      |          |                            |
| 1434129_s_at             | Lhfp12      | 1.93E-02 | 1.68                  |                          |          |                            |



| Probe Set<br>Mouse Array | Gene Symbol | p-value  | Fold change<br>Het/WT | Probe Set<br>Human Array | p-value  | Fold change<br>DDS/Control |
|--------------------------|-------------|----------|-----------------------|--------------------------|----------|----------------------------|
| 1444085_at               | Pdss2       | 4.63E-02 | 1.68                  |                          |          |                            |
| 1437370_at               | Sgol2       | 4.71E-02 | 1.68                  | n/p                      |          |                            |
| 1416740_at               | Col5a1      | 3.14E-02 | 1.68                  |                          |          |                            |
| 1427313_at               | Ptgir       | 1.79E-02 | 1.67                  |                          |          |                            |
| 1422527_at               | H2-DMa      | 3.42E-02 | 1.67                  | n/p                      |          |                            |
| 1449125_at               | Tnfaip8l1   | 4.10E-02 | 1.67                  | n/p                      |          |                            |
| 1418359_at               | Wbscr27     | 1.95E-02 | 1.67                  | n/p                      |          |                            |
| 1419149_at               | Serpine1    | 1.64E-02 | 1.67                  |                          |          |                            |
| 1424726_at               | Tmem150     | 3.51E-02 | 1.67                  | n/p                      |          |                            |
| 1438010_at               | Tmem201     | 1.92E-02 | 1.67                  | n/p                      |          |                            |
| 1455885_at               | Amz1        | 2.22E-02 | 1.67                  | n/p                      |          |                            |
| 1458054_at               | Ext1        | 4.29E-02 | 1.66                  |                          |          |                            |
| 1448378_at               | Fscn1       | 3.06E-02 | 1.66                  |                          |          |                            |
| 1437343_x_at             | Atad3a      | 1.26E-02 | 1.65                  |                          |          |                            |
| 1418905_at               | Nubp1       | 1.19E-02 | 1.65                  |                          |          |                            |
| 1449464_at               | Kcnq1       | 1.33E-02 | 1.65                  |                          |          |                            |
| 1419758_at               | Abcb1a      | 2.03E-02 | 1.65                  | n/p                      |          |                            |
| 1418795_at               | Cds2        | 5.53E-04 | 1.65                  |                          |          |                            |
| 1416531_at               | Gsto1       | 1.63E-02 | 1.64                  |                          |          |                            |
| 1434190_at               | Sms         | 4.70E-02 | 1.64                  | 202043_s_at              | 1.84E-02 | 1.61                       |
| 1459838_s_at             | Btbd11      | 2.19E-02 | 1.64                  | n/p                      |          |                            |
| 1423630_at               | Cygb        | 2.89E-02 | 1.63                  | n/p                      |          |                            |
| 1434575_at               | Epb4.1l1    | 1.02E-02 | 1.63                  | n/p                      |          |                            |
| 1421709_a_at             | Fmo5        | 4.77E-02 | 1.63                  |                          |          |                            |
| 1419573_a_at             | Lgals1      | 5.53E-03 | 1.63                  |                          |          |                            |
| 1439773_at               | Ly6e        | 1.47E-02 | 1.63                  |                          |          |                            |
| 1431079_at               | C1qtnf2     | 2.00E-02 | 1.62                  | n/p                      |          |                            |
| 1425264_s_at             | Mbp         | 3.17E-02 | 1.62                  |                          |          |                            |
| 1425601_a_at             | Rtkn        | 2.28E-02 | 1.62                  | n/p                      |          |                            |
| 1441259_s_at             | Ift122      | 2.81E-02 | 1.62                  |                          |          |                            |
| 1460719_a_at             | P2rx1       | 2.63E-02 | 1.61                  |                          |          |                            |
| 1438244_at               | Nfib        | 1.57E-03 | 1.61                  |                          |          |                            |
| 1421679_a_at             | Cdkn1a      | 2.97E-02 | 1.61                  |                          |          |                            |
| 1448964_at               | S100g       | 3.10E-02 | 1.61                  |                          |          |                            |
| 1449246_at               | Rundc3a     | 3.55E-02 | 1.60                  |                          |          |                            |
| 1433781_a_at             | Cldn12      | 4.52E-02 | 1.60                  | n/p                      |          |                            |
| 1434695_at               | Dtl         | 1.29E-02 | 1.60                  |                          |          |                            |
| 1419589_at               | Cd93        | 4.81E-02 | 1.60                  |                          |          |                            |
| 1449049_at               | Tlr1        | 4.23E-02 | 1.59                  |                          |          |                            |
| 1448823_at               | Cxcl12      | 8.75E-03 | 1.59                  |                          |          |                            |
| 1434153_at               | Shb         | 4.37E-02 | 1.59                  |                          |          |                            |
| 1437886_at               | Klh6        | 2.88E-02 | 1.58                  | n/p                      |          |                            |
| 1417026_at               | Pfdn1       | 1.51E-02 | 1.58                  | 201507_at                | 2.43E-03 | 1.57                       |
| 1441214_at               | Expn5       | 4.47E-03 | 1.58                  |                          |          |                            |
| 1416118_at               | Trim59      | 1.84E-02 | 1.58                  | n/p                      |          |                            |
| 1422524_at               | Abcb6       | 2.60E-02 | 1.58                  |                          |          |                            |
| 1442267_at               | Stxbp4      | 4.10E-02 | 1.58                  | n/p                      |          |                            |
| 1455027_at               | Rufy3       | 3.20E-02 | 1.58                  |                          |          |                            |
| 1424086_at               | Oaf         | 1.23E-02 | 1.58                  | n/p                      |          |                            |
| 1425484_at               | Tox         | 1.09E-02 | 1.58                  |                          |          |                            |
| 1450140_a_at             | Cdkn2a      | 8.20E-04 | 1.58                  |                          |          |                            |
| 1418778_at               | Ccdc109b    | 1.02E-02 | 1.58                  |                          |          |                            |
| 1417599_at               | Cd276       | 2.86E-02 | 1.58                  | n/p                      |          |                            |
| 1433684_at               | Chmp6       | 2.20E-02 | 1.57                  |                          |          |                            |
| 1453067_at               | Apitd1      | 1.16E-02 | 1.57                  |                          |          |                            |
| 1439766_x_at             | Vegfc       | 1.09E-02 | 1.57                  |                          |          |                            |
| 1449903_at               | Crtam       | 3.07E-02 | 1.57                  |                          |          |                            |
| 1417227_at               | Mccc1       | 4.85E-02 | 1.57                  |                          |          |                            |
| 1428928_at               | Cacnb4      | 4.41E-02 | 1.57                  |                          |          |                            |
| 1456735_x_at             | Acpi2       | 8.33E-03 | 1.56                  | n/p                      |          |                            |
| 1424131_at               | Col6a3      | 2.51E-02 | 1.56                  |                          |          |                            |
| 1418606_at               | Hoxd10      | 3.81E-02 | 1.56                  |                          |          |                            |
| 1438953_at               | Figf        | 1.39E-02 | 1.56                  |                          |          |                            |
| 1438466_at               | Dnahc7b     | 1.16E-03 | 1.56                  | n/p                      |          |                            |
| 1458097_at               | Cobll1      | 1.60E-02 | 1.55                  |                          |          |                            |
| 1460227_at               | Timp1       | 1.31E-02 | 1.55                  |                          |          |                            |
| 1438319_x_at             | Fastkd2     | 6.76E-03 | 1.55                  |                          |          |                            |
| 1450923_at               | Tgfb2       | 1.85E-04 | 1.55                  |                          |          |                            |
| 1451978_at               | Loxl1       | 4.62E-02 | 1.55                  |                          |          |                            |
| 1456728_x_at             | Aco1        | 3.01E-02 | 1.55                  |                          |          |                            |

| Probe Set<br>Mouse Array | Gene Symbol | p-value  | Fold change<br>Het/WT | Probe Set<br>Human Array | p-value  | Fold change<br>DDS/Control |
|--------------------------|-------------|----------|-----------------------|--------------------------|----------|----------------------------|
| 1429466_s_at             | Aph1c       | 1.43E-02 | 1.54                  | n/p                      |          |                            |
| 1448690_at               | Kcnk1       | 2.41E-02 | 1.54                  |                          |          |                            |
| 1417439_at               | Cd248       | 2.55E-02 | 1.54                  |                          |          |                            |
| 1418862_at               | Echdc3      | 4.15E-02 | 1.54                  | 219298_at                | 3.62E-02 | 1.93                       |
| 1433436_s_at             | Thtpa       | 4.59E-03 | 1.54                  |                          |          |                            |
| 1420715_a_at             | Pparg       | 2.17E-02 | 1.53                  | 208510_s_at              | 2.29E-03 | 1.53                       |
| 1447780_x_at             | Tufm        | 4.24E-02 | 1.53                  |                          |          |                            |
| 1449040_a_at             | Sephs2      | 4.54E-02 | 1.53                  |                          |          |                            |
| 1449221_a_at             | Rrbp1       | 7.48E-03 | 1.53                  |                          |          |                            |
| 1417323_at               | Psrc1       | 3.22E-03 | 1.53                  |                          |          |                            |
| 1418076_at               | St14        | 2.98E-02 | 1.53                  | 202005_at                | 2.16E-02 | 1.79                       |
| 1416591_at               | Rab34       | 7.36E-03 | 1.53                  | n/p                      |          |                            |
| 1422084_at               | Bmx         | 4.95E-02 | 1.53                  |                          |          |                            |
| 1442623_at               | Mef2a       | 3.42E-02 | 1.53                  |                          |          |                            |
| 1415810_at               | Uhrf1       | 1.59E-02 | 1.53                  | n/p                      |          |                            |
| 1451968_at               | Xrcc5       | 4.74E-02 | 1.52                  |                          |          |                            |
| 1423551_at               | Cdh13       | 3.50E-02 | 1.52                  |                          |          |                            |
| 1419130_at               | Adat2       | 4.66E-02 | 1.52                  | n/p                      |          |                            |
| 1457587_at               | Kcnq5       | 2.20E-02 | 1.52                  | n/p                      |          |                            |
| 1455841_s_at             | Grwd1       | 4.84E-02 | 1.52                  |                          |          |                            |
| 1448383_at               | Mmp14       | 1.45E-02 | 1.52                  | 202827_s_at              | 1.42E-02 | 1.98                       |
| 1425182_x_at             | Klk1b22     | 1.26E-02 | 1.52                  | n/p                      |          |                            |
| 1448501_at               | Tspan6      | 1.12E-02 | 1.52                  |                          |          |                            |
| 1439550_at               | Tnrc18      | 2.36E-02 | 1.52                  | n/p                      |          |                            |
| 1418186_at               | Gstt1       | 1.73E-02 | 1.52                  |                          |          |                            |
| 1424418_at               | Slc25a38    | 3.31E-02 | 1.52                  |                          |          |                            |
| 1450718_at               | Sh2b2       | 4.03E-02 | 1.52                  |                          |          |                            |
| 1448404_at               | Scamp2      | 1.59E-02 | 1.52                  |                          |          |                            |
| 1418796_at               | Clec11a     | 2.08E-02 | 1.52                  |                          |          |                            |
| 1417591_at               | Ptges2      | 4.88E-03 | 1.51                  |                          |          |                            |
| 1428427_at               | Fbxl2       | 5.78E-03 | 1.51                  |                          |          |                            |
| 1435720_at               | Kcnd3       | 2.10E-03 | 1.51                  |                          |          |                            |
| 1438517_at               | Wwox        | 2.25E-03 | 1.50                  |                          |          |                            |
| 1438060_at               | Npas3       | 5.95E-03 | 1.50                  |                          |          |                            |
| 1424542_at               | S100a4      | 4.00E-02 | 1.50                  |                          |          |                            |
| 1439155_at               | Mettl1      | 2.73E-02 | 1.50                  |                          |          |                            |
| 1457736_at               | Vps37d      | 4.58E-02 | 1.50                  | n/p                      |          |                            |
| 1424059_at               | Suv420h2    | 3.16E-03 | 1.50                  | n/p                      |          |                            |
| 1427387_a_at             | Itgb4       | 1.08E-03 | 1.50                  |                          |          |                            |
| 1455396_at               | Atp8b1      | 2.09E-02 | -1.50                 |                          |          |                            |
| 1433623_at               | Zfp367      | 2.45E-02 | -1.50                 | n/p                      |          |                            |
| 1449337_at               | Tdo2        | 4.78E-02 | -1.50                 |                          |          |                            |
| 1434776_at               | Sema5a      | 2.14E-02 | -1.50                 |                          |          |                            |
| 1455083_at               | Atp11c      | 1.32E-02 | -1.50                 | n/p                      |          |                            |
| 1435556_at               | Zfp597      | 1.64E-02 | -1.50                 | n/p                      |          |                            |
| 1448780_at               | Slc12a2     | 2.48E-02 | -1.50                 | 204404_at                | 9.60E-03 | -2.78                      |
| 1415728_at               | Pabpn1      | 4.67E-02 | -1.50                 |                          |          |                            |
| 1431066_at               | Fut11       | 1.45E-02 | -1.50                 | n/p                      |          |                            |
| 1434833_at               | Map4k2      | 3.17E-02 | -1.50                 |                          |          |                            |
| 1424595_at               | F11r        | 6.41E-03 | -1.50                 |                          |          |                            |
| 1450676_at               | Tceb3       | 4.22E-02 | -1.51                 |                          |          |                            |
| 1425376_at               | Alox8       | 2.98E-02 | -1.51                 | n/p                      |          |                            |
| 1452391_at               | Cxadr       | 3.31E-02 | -1.51                 |                          |          |                            |
| 1425974_a_at             | Trim25      | 3.69E-02 | -1.51                 |                          |          |                            |
| 1450227_at               | Ankrd6      | 3.66E-02 | -1.51                 |                          |          |                            |
| 1427567_a_at             | Tpm3        | 4.09E-02 | -1.51                 |                          |          |                            |
| 1418663_at               | Mpdz        | 1.24E-02 | -1.51                 |                          |          |                            |
| 1426583_at               | Atf2        | 2.43E-02 | -1.51                 |                          |          |                            |
| 1438129_at               | Wsb2        | 1.68E-02 | -1.51                 | 213734_at                | 3.27E-03 | -1.89                      |
| 1430205_a_at             | Cdc37l1     | 4.30E-02 | -1.51                 |                          |          |                            |
| 1448309_at               | Ap3m1       | 1.73E-02 | -1.51                 | n/p                      |          |                            |
| 1437513_a_at             | Serinc1     | 3.94E-03 | -1.51                 |                          |          |                            |
| 1453853_a_at             | Arhgef12    | 8.20E-03 | -1.51                 |                          |          |                            |
| 1434476_at               | Crtc1       | 2.43E-02 | -1.51                 |                          |          |                            |
| 1422792_at               | Pafah1b2    | 2.53E-02 | -1.51                 |                          |          |                            |
| 1435320_at               | Ctdspl2     | 4.55E-02 | -1.51                 | n/p                      |          |                            |
| 1442007_at               | Zmym5       | 1.10E-02 | -1.51                 |                          |          |                            |
| 1423280_at               | Stmn2       | 2.03E-02 | -1.51                 |                          |          |                            |
| 1423112_at               | Ube2d3      | 1.51E-02 | -1.52                 |                          |          |                            |
| 1425670_at               | Rfxank      | 3.33E-02 | -1.52                 |                          |          |                            |

| Probe Set<br>Mouse Array | Gene Symbol | p-value  | Fold change<br>Het/WT | Probe Set<br>Human Array | p-value  | Fold change<br>DDS/Control |
|--------------------------|-------------|----------|-----------------------|--------------------------|----------|----------------------------|
| 1441993_at               | Ap3s2       | 9.71E-03 | -1.52                 |                          |          |                            |
| 1423117_at               | Pum1        | 2.14E-02 | -1.52                 |                          |          |                            |
| 1423452_at               | Stk17b      | 1.22E-02 | -1.52                 |                          |          |                            |
| 1455300_at               | Tet2        | 4.08E-02 | -1.52                 |                          |          |                            |
| 1436405_at               | Dock4       | 2.76E-02 | -1.52                 | n/p                      |          |                            |
| 1449029_at               | Mknk2       | 2.58E-02 | -1.52                 | 205003_at                | 4.78E-02 | -2.56                      |
| 1421957_a_at             | Pcyt1a      | 6.60E-03 | -1.52                 |                          |          |                            |
| 1436616_at               | Inpp4a      | 2.82E-03 | -1.52                 |                          |          |                            |
| 1434628_a_at             | Rhpn2       | 2.70E-02 | -1.52                 | n/p                      |          |                            |
| 1450378_at               | Tapbp       | 1.68E-02 | -1.52                 |                          |          |                            |
| 1452519_a_at             | Zfp36       | 1.05E-02 | -1.52                 |                          |          |                            |
| 1436089_at               | Ints6       | 4.83E-02 | -1.52                 |                          |          |                            |
| 1431760_a_at             | Sdccag3     | 2.11E-02 | -1.52                 |                          |          |                            |
| 1430856_at               | Pex11c      | 4.51E-02 | -1.52                 | n/p                      |          |                            |
| 1452140_at               | Tbc1d20     | 2.73E-02 | -1.52                 | n/p                      |          |                            |
| 1453997_a_at             | Nes         | 2.50E-02 | -1.52                 |                          |          |                            |
| 1451010_at               | Nol11       | 4.04E-02 | -1.52                 |                          |          |                            |
| 1451761_at               | Hoxb4       | 3.22E-02 | -1.52                 | n/p                      |          |                            |
| 1420951_a_at             | Son         | 1.05E-02 | -1.53                 |                          |          |                            |
| 1419101_at               | Sin3a       | 2.25E-03 | -1.53                 | n/p                      |          |                            |
| 1427969_s_at             | Zfp654      | 3.78E-02 | -1.53                 | n/p                      |          |                            |
| 1430064_at               | Ttll11      | 6.52E-03 | -1.53                 | n/p                      |          |                            |
| 1455140_at               | Pitpnm3     | 3.72E-02 | -1.53                 |                          |          |                            |
| 1455764_at               | Vprbp       | 1.60E-02 | -1.53                 |                          |          |                            |
| 1422018_at               | Hivep2      | 3.64E-02 | -1.53                 |                          |          |                            |
| 1417755_at               | Topors      | 1.00E-02 | -1.53                 |                          |          |                            |
| 1429686_at               | Polr3f      | 3.32E-03 | -1.53                 |                          |          |                            |
| 1440022_at               | Poldip3     | 5.31E-04 | -1.53                 |                          |          |                            |
| 1439037_at               | Ddx17       | 1.58E-02 | -1.54                 |                          |          |                            |
| 1426610_a_at             | Ttf1        | 4.54E-02 | -1.54                 |                          |          |                            |
| 1452857_at               | Crebzf      | 2.26E-02 | -1.54                 | 202978_s_at              | 3.38E-02 | -2.22                      |
| 1454831_at               | Foxn2       | 2.64E-02 | -1.54                 |                          |          |                            |
| 1418513_at               | Stk3        | 1.04E-02 | -1.54                 |                          |          |                            |
| 1426360_at               | Zc3h11a     | 9.77E-03 | -1.54                 |                          |          |                            |
| 1426349_s_at             | Tmpo        | 3.61E-02 | -1.54                 |                          |          |                            |
| 1419250_a_at             | Pftk1       | 1.11E-02 | -1.54                 |                          |          |                            |
| 1452228_at               | Tbc1d23     | 8.45E-03 | -1.54                 | n/p                      |          |                            |
| 1420615_at               | Ash2l       | 5.87E-03 | -1.54                 |                          |          |                            |
| 1418114_at               | Rbpj        | 1.56E-02 | -1.54                 |                          |          |                            |
| 1457400_at               | Snx19       | 2.12E-02 | -1.54                 |                          |          |                            |
| 1434602_at               | Med13l      | 2.71E-02 | -1.54                 |                          |          |                            |
| 1442186_at               | Atxn7       | 3.99E-02 | -1.54                 |                          |          |                            |
| 1418246_at               | Rbm9        | 1.33E-02 | -1.54                 |                          |          |                            |
| 1417539_at               | Slc35a1     | 4.49E-02 | -1.54                 |                          |          |                            |
| 1431385_a_at             | Mbtps1      | 9.34E-03 | -1.54                 |                          |          |                            |
| 1453623_a_at             | Rad23a      | 1.21E-03 | -1.54                 |                          |          |                            |
| 1420918_at               | Sgk3        | 2.79E-02 | -1.54                 | n/p                      |          |                            |
| 1415823_at               | Scd2        | 6.41E-03 | -1.55                 |                          |          |                            |
| 1416201_at               | Crk         | 1.12E-03 | -1.55                 |                          |          |                            |
| 1416292_at               | Prdx3       | 2.96E-02 | -1.55                 |                          |          |                            |
| 1429776_a_at             | Dnajb6      | 9.08E-03 | -1.55                 | 208810_at                | 1.04E-02 | -1.82                      |
| 1451494_at               | Wac         | 1.29E-02 | -1.55                 |                          |          |                            |
| 1431746_a_at             | Uba3        | 6.74E-03 | -1.55                 |                          |          |                            |
| 1425497_a_at             | Prpf4b      | 8.60E-03 | -1.55                 |                          |          |                            |
| 1455335_at               | Xrcc2       | 3.56E-03 | -1.55                 |                          |          |                            |
| 1460665_a_at             | Cnot7       | 1.63E-02 | -1.55                 |                          |          |                            |
| 1423174_a_at             | Pard6b      | 2.13E-02 | -1.55                 |                          |          |                            |
| 1419361_at               | Ss18        | 3.84E-03 | -1.55                 |                          |          |                            |
| 1439938_at               | Stk38       | 5.93E-03 | -1.55                 |                          |          |                            |
| 1433632_at               | Irf2bp2     | 4.85E-02 | -1.55                 | n/p                      |          |                            |
| 1436070_at               | Glo1        | 1.80E-02 | -1.55                 |                          |          |                            |
| 1427367_at               | Efcab4a     | 1.31E-02 | -1.55                 | n/p                      |          |                            |
| 1452783_at               | Fndc3b      | 2.79E-02 | -1.55                 |                          |          |                            |
| 1431686_a_at             | Gmfb        | 1.94E-02 | -1.56                 |                          |          |                            |
| 1421889_a_at             | Ap1p2       | 2.22E-02 | -1.56                 |                          |          |                            |
| 1417261_at               | Mbtd1       | 2.09E-02 | -1.56                 |                          |          |                            |
| 1454951_at               | Zfp606      | 4.28E-02 | -1.56                 | n/p                      |          |                            |
| 1452766_at               | Tppp        | 2.69E-02 | -1.56                 |                          |          |                            |
| 1426221_at               | Vwa5a       | 2.14E-02 | -1.56                 |                          |          |                            |
| 1416732_at               | Top2b       | 7.46E-03 | -1.56                 |                          |          |                            |

| Probe Set<br>Mouse Array | Gene Symbol | p-value  | Fold change<br>Het/WT | Probe Set<br>Human Array | p-value  | Fold change<br>DDS/Control |
|--------------------------|-------------|----------|-----------------------|--------------------------|----------|----------------------------|
| 1436354_at               | Dzip1l      | 3.49E-02 | -1.56                 | n/p                      |          |                            |
| 1421550_a_at             | Trim34      | 1.65E-02 | -1.56                 |                          |          |                            |
| 1455683_a_at             | Tbc1d8      | 3.65E-03 | -1.56                 |                          |          |                            |
| 1418898_at               | Lin7c       | 3.68E-02 | -1.56                 |                          |          |                            |
| 1425845_a_at             | Shoc2       | 5.04E-03 | -1.56                 |                          |          |                            |
| 1425995_s_at             | Wt1         | 3.76E-02 | -1.56                 | 206067_s_at              | 5.98E-03 | -3.03                      |
| 1440195_at               | Serbp1      | 6.64E-04 | -1.56                 |                          |          |                            |
| 1428402_at               | Zcchc3      | 2.36E-02 | -1.56                 | n/p                      |          |                            |
| 1452077_at               | Ddx3y       | 1.66E-03 | -1.56                 |                          |          |                            |
| 1458233_at               | Fryl        | 2.90E-02 | -1.56                 |                          |          |                            |
| 1437477_at               | Lrrfip1     | 8.63E-03 | -1.56                 |                          |          |                            |
| 1428117_x_at             | Dynlt1      | 4.55E-02 | -1.56                 |                          |          |                            |
| 1423054_at               | Wdr1        | 2.77E-02 | -1.56                 |                          |          |                            |
| 1450874_at               | Matr3       | 5.86E-03 | -1.56                 |                          |          |                            |
| 1459951_at               | Rps6kb1     | 2.57E-02 | -1.56                 |                          |          |                            |
| 1424390_at               | Nupl1       | 1.85E-02 | -1.56                 |                          |          |                            |
| 1452449_at               | Hmbox1      | 1.70E-02 | -1.57                 |                          |          |                            |
| 1450396_at               | Stag2       | 9.42E-03 | -1.57                 |                          |          |                            |
| 1450916_at               | Stau2       | 3.84E-02 | -1.57                 |                          |          |                            |
| 1417163_at               | Dusp10      | 8.04E-03 | -1.57                 |                          |          |                            |
| 1419356_at               | Klf7        | 1.13E-02 | -1.57                 |                          |          |                            |
| 1448444_at               | Rpe         | 1.98E-02 | -1.57                 |                          |          |                            |
| 1436982_at               | Tnrc6b      | 1.02E-02 | -1.57                 |                          |          |                            |
| 1449515_at               | Zfp292      | 3.04E-02 | -1.57                 | n/p                      |          |                            |
| 1425487_at               | Slu7        | 1.10E-02 | -1.57                 | n/p                      |          |                            |
| 1449999_a_at             | Cacna2d1    | 5.00E-03 | -1.57                 |                          |          |                            |
| 1421139_a_at             | Zfp386      | 1.64E-02 | -1.57                 | n/p                      |          |                            |
| 1460213_at               | Golga4      | 8.30E-03 | -1.57                 |                          |          |                            |
| 1416123_at               | Ccnd2       | 5.71E-03 | -1.57                 | 200953_s_at              | 2.62E-04 | -3.03                      |
| 1443142_at               | Btrc        | 3.74E-02 | -1.57                 |                          |          |                            |
| 1433925_at               | Dync1li2    | 2.80E-02 | -1.57                 |                          |          |                            |
| 1449069_at               | Zfp148      | 5.79E-03 | -1.58                 | n/p                      |          |                            |
| 1452385_at               | Usp53       | 4.98E-03 | -1.58                 |                          |          |                            |
| 1427489_at               | Itga8       | 3.08E-02 | -1.58                 |                          |          |                            |
| 1436325_at               | Rora        | 1.98E-02 | -1.58                 |                          |          |                            |
| 1440543_at               | Heatr5a     | 9.01E-03 | -1.58                 | n/p                      |          |                            |
| 1430057_s_at             | Lrrc57      | 9.17E-03 | -1.58                 | n/p                      |          |                            |
| 1415729_at               | Pdpk1       | 2.44E-02 | -1.58                 |                          |          |                            |
| 1460331_at               | Tm9sf2      | 3.23E-02 | -1.58                 |                          |          |                            |
| 1420479_a_at             | Nap1l1      | 6.75E-03 | -1.58                 |                          |          |                            |
| 1418819_at               | Arl8b       | 2.60E-02 | -1.58                 |                          |          |                            |
| 1439503_at               | Zfp28       | 4.83E-02 | -1.58                 | n/p                      |          |                            |
| 1427189_at               | Arih1       | 2.26E-03 | -1.59                 |                          |          |                            |
| 1425755_at               | Mtcp1       | 2.97E-03 | -1.59                 |                          |          |                            |
| 1459034_at               | Wdr19       | 1.48E-02 | -1.59                 |                          |          |                            |
| 1430827_a_at             | Ptk2        | 1.23E-02 | -1.59                 |                          |          |                            |
| 1437568_at               | Mmp16       | 3.86E-02 | -1.59                 | n/p                      |          |                            |
| 1448793_a_at             | Sdc4        | 4.46E-02 | -1.59                 |                          |          |                            |
| 1449414_at               | Zfp53       | 3.81E-02 | -1.59                 | n/p                      |          |                            |
| 1423994_at               | Kif1b       | 3.82E-02 | -1.59                 | 209234_at                | 2.85E-03 | -1.51                      |
| 1460662_at               | Per3        | 4.74E-02 | -1.59                 |                          |          |                            |
| 1456407_a_at             | Tlk1        | 2.20E-02 | -1.59                 |                          |          |                            |
| 1421069_at               | Phf2        | 2.65E-02 | -1.59                 |                          |          |                            |
| 1418258_s_at             | Dynll2      | 8.62E-04 | -1.59                 | n/p                      |          |                            |
| 1420547_at               | Galc        | 2.19E-02 | -1.59                 |                          |          |                            |
| 1439555_at               | Rlf         | 4.31E-02 | -1.60                 |                          |          |                            |
| 1435152_at               | Leng8       | 2.83E-02 | -1.60                 | n/p                      |          |                            |
| 1424483_at               | Mobkl1b     | 4.17E-03 | -1.60                 |                          |          |                            |
| 1422321_a_at             | Sf1         | 1.33E-02 | -1.60                 |                          |          |                            |
| 1453413_at               | Gnas        | 7.40E-03 | -1.60                 |                          |          |                            |
| 1437476_at               | Rrm2b       | 1.15E-02 | -1.60                 | n/p                      |          |                            |
| 1421338_at               | Elf4        | 1.16E-02 | -1.60                 |                          |          |                            |
| 1453160_at               | Med13       | 3.81E-02 | -1.60                 |                          |          |                            |
| 1423490_at               | Fbxo3       | 3.29E-02 | -1.60                 |                          |          |                            |
| 1429655_at               | Nudcd1      | 4.27E-02 | -1.60                 | n/p                      |          |                            |
| 1417502_at               | Tspan7      | 2.41E-02 | -1.60                 |                          |          |                            |
| 1438397_a_at             | Rbm39       | 1.49E-02 | -1.60                 |                          |          |                            |
| 1448781_at               | Nab1        | 1.90E-02 | -1.60                 | 209272_at                | 7.14E-03 | -1.54                      |
| 1450478_a_at             | Ptpn12      | 1.97E-02 | -1.61                 |                          |          |                            |
| 1451800_at               | Gcc2        | 1.53E-02 | -1.61                 |                          |          |                            |

| Probe Set<br>Mouse Array | Gene Symbol | p-value  | Fold change<br>Het/WT | Probe Set<br>Human Array | p-value  | Fold change<br>DDS/Control |
|--------------------------|-------------|----------|-----------------------|--------------------------|----------|----------------------------|
| 1420990_at               | Chd1        | 3.04E-02 | -1.61                 |                          |          |                            |
| 1424287_at               | Prkx        | 2.36E-02 | -1.61                 | 204060_s_at              | 1.05E-02 | -1.61                      |
| 1450207_at               | Lifr        | 3.10E-02 | -1.61                 |                          |          |                            |
| 1429144_at               | Prei4       | 7.70E-03 | -1.61                 | n/p                      |          |                            |
| 1422901_at               | Mgea5       | 4.86E-02 | -1.61                 |                          |          |                            |
| 1436224_at               | Kif1c       | 5.88E-03 | -1.61                 |                          |          |                            |
| 1430700_a_at             | Pla2g7      | 1.04E-02 | -1.61                 |                          |          |                            |
| 1434395_at               | Man1a2      | 2.03E-02 | -1.62                 |                          |          |                            |
| 1426191_a_at             | Bcl2l1      | 4.69E-02 | -1.62                 |                          |          |                            |
| 1449157_at               | Nr2c1       | 1.15E-02 | -1.62                 |                          |          |                            |
| 1457780_at               | Stx11       | 3.23E-02 | -1.62                 |                          |          |                            |
| 1422938_at               | Bcl2        | 2.84E-02 | -1.62                 |                          |          |                            |
| 1433944_at               | Hectd2      | 1.79E-02 | -1.62                 | n/p                      |          |                            |
| 1457948_at               | Gas7        | 9.03E-03 | -1.63                 |                          |          |                            |
| 1457359_at               | Inpp4b      | 1.48E-02 | -1.63                 |                          |          |                            |
| 1416986_a_at             | Sirpa       | 4.93E-02 | -1.63                 |                          |          |                            |
| 1417724_at               | Thoc4       | 6.61E-03 | -1.63                 | n/p                      |          |                            |
| 1425074_at               | Wrn         | 4.87E-02 | -1.63                 |                          |          |                            |
| 1423852_at               | Shisa2      | 4.55E-02 | -1.63                 | n/p                      |          |                            |
| 1417307_at               | Dmd         | 1.87E-02 | -1.63                 | 203881_s_at              | 8.93E-03 | -2.38                      |
| 1452336_at               | Zfp395      | 1.36E-02 | -1.63                 | n/p                      |          |                            |
| 1427673_a_at             | Sema3e      | 1.80E-02 | -1.63                 |                          |          |                            |
| 1450917_at               | Myom2       | 4.80E-02 | -1.63                 |                          |          |                            |
| 1432155_at               | Wasl        | 1.32E-02 | -1.63                 |                          |          |                            |
| 1453920_a_at             | Mospd2      | 8.51E-03 | -1.64                 |                          |          |                            |
| 1452163_at               | Ets1        | 1.07E-02 | -1.64                 |                          |          |                            |
| 1456088_at               | Xiap        | 7.54E-03 | -1.64                 |                          |          |                            |
| 1438713_at               | Rassf8      | 1.86E-02 | -1.64                 |                          |          |                            |
| 1434957_at               | Cdon        | 4.36E-02 | -1.64                 |                          |          |                            |
| 1450710_at               | Jarid2      | 2.50E-03 | -1.64                 |                          |          |                            |
| 1433491_at               | Epb4.112    | 2.45E-03 | -1.64                 | n/p                      |          |                            |
| 1426622_a_at             | Qpct        | 5.53E-03 | -1.64                 |                          |          |                            |
| 1438306_at               | Rnf180      | 1.64E-02 | -1.64                 | n/p                      |          |                            |
| 1426849_at               | Sec24b      | 4.40E-02 | -1.64                 |                          |          |                            |
| 1459896_at               | Pogk        | 2.52E-02 | -1.64                 |                          |          |                            |
| 1427831_s_at             | Zfp260      | 3.43E-02 | -1.65                 | n/p                      |          |                            |
| 1460510_a_at             | Coq10b      | 4.43E-03 | -1.65                 |                          |          |                            |
| 1424568_at               | Tspan2      | 2.46E-02 | -1.65                 |                          |          |                            |
| 1417358_s_at             | Sorbs1      | 9.04E-03 | -1.65                 | 218087_s_at              | 2.86E-04 | -1.61                      |
| 1420866_at               | Zfp161      | 2.67E-02 | -1.65                 |                          |          |                            |
| 1428514_at               | Cpne3       | 3.27E-02 | -1.65                 |                          |          |                            |
| 1417570_at               | Anapc1      | 3.87E-02 | -1.65                 |                          |          |                            |
| 1433739_at               | Nol10       | 1.68E-02 | -1.65                 |                          |          |                            |
| 1421545_a_at             | Syne1       | 1.30E-02 | -1.66                 |                          |          |                            |
| 1422974_at               | Nt5e        | 3.78E-02 | -1.66                 | 203939_at                | 6.67E-03 | -4.17                      |
| 1436551_at               | Fgfr1       | 9.46E-03 | -1.66                 |                          |          |                            |
| 1448348_at               | Caprin1     | 4.00E-04 | -1.66                 |                          |          |                            |
| 1427122_at               | Copg2as2    | 3.17E-02 | -1.66                 | n/p                      |          |                            |
| 1443554_at               | Ssbp3       | 2.84E-02 | -1.66                 |                          |          |                            |
| 1458887_at               | Tcf21       | 2.51E-02 | -1.66                 |                          |          |                            |
| 1448851_a_at             | Dnajc5      | 3.78E-03 | -1.66                 | n/p                      |          |                            |
| 1436067_at               | Zbtb10      | 1.56E-03 | -1.66                 |                          |          |                            |
| 1421121_at               | Akap10      | 3.79E-03 | -1.66                 |                          |          |                            |
| 1456150_at               | Jhdm1d      | 1.44E-03 | -1.66                 |                          |          |                            |
| 1416157_at               | Vcl         | 1.49E-03 | -1.67                 |                          |          |                            |
| 1426571_at               | Ano1        | 4.31E-03 | -1.67                 |                          |          |                            |
| 1433514_at               | Etnk1       | 3.27E-03 | -1.67                 |                          |          |                            |
| 1416318_at               | Serpinb1a   | 1.70E-02 | -1.67                 | n/p                      |          |                            |
| 1424158_at               | Ehd2        | 4.62E-03 | -1.67                 |                          |          |                            |
| 1427468_at               | Ppp3cb      | 6.04E-03 | -1.67                 |                          |          |                            |
| 1436299_at               | Gls         | 3.41E-02 | -1.67                 | 203159_at                | 1.75E-02 | -1.61                      |
| 1456890_at               | Ddx58       | 4.35E-02 | -1.67                 |                          |          |                            |
| 1423364_a_at             | Aktip       | 3.06E-02 | -1.68                 |                          |          |                            |
| 1427562_a_at             | Prkca       | 4.04E-02 | -1.68                 |                          |          |                            |
| 1422551_at               | Zkscan3     | 7.49E-03 | -1.68                 |                          |          |                            |
| 1431592_a_at             | Sh3kbp1     | 3.86E-04 | -1.68                 | n/p                      |          |                            |
| 1426090_a_at             | Fert2       | 7.95E-03 | -1.68                 | n/p                      |          |                            |
| 1423599_a_at             | Pdcl        | 1.15E-02 | -1.68                 |                          |          |                            |
| 1453628_s_at             | Lrrc2       | 1.80E-02 | -1.68                 |                          |          |                            |
| 1448219_a_at             | Ywhaz       | 4.84E-02 | -1.68                 | 200640_at                | 1.80E-02 | 1.57                       |

| Probe Set<br>Mouse Array | Gene Symbol | p-value  | Fold change<br>Het/WT | Probe Set<br>Human Array | p-value  | Fold change<br>DDS/Control |
|--------------------------|-------------|----------|-----------------------|--------------------------|----------|----------------------------|
| 1439604_at               | Adamts16    | 1.54E-02 | -1.68                 | n/p                      |          |                            |
| 1455095_at               | Hist2h2be   | 3.71E-03 | -1.68                 |                          |          |                            |
| 1435220_s_at             | Cdc42se2    | 5.45E-03 | -1.68                 | n/p                      |          |                            |
| 1432411_a_at             | Fbxw2       | 3.73E-03 | -1.68                 |                          |          |                            |
| 1422896_at               | Vamp4       | 3.86E-02 | -1.68                 |                          |          |                            |
| 1421383_at               | Ccdc82      | 4.60E-03 | -1.68                 |                          |          |                            |
| 1421916_at               | Pdgfra      | 4.03E-02 | -1.69                 |                          |          |                            |
| 1416525_at               | Spop        | 8.68E-03 | -1.69                 |                          |          |                            |
| 1436343_at               | Chd4        | 3.21E-02 | -1.69                 |                          |          |                            |
| 1455026_at               | Sbno1       | 2.19E-02 | -1.69                 |                          |          |                            |
| 1435877_at               | Stk38l      | 1.59E-02 | -1.69                 |                          |          |                            |
| 1423387_at               | Psmc9       | 3.51E-02 | -1.69                 |                          |          |                            |
| 1452398_at               | Plice1      | 2.16E-02 | -1.69                 |                          |          |                            |
| 1450379_at               | Msn         | 1.41E-02 | -1.69                 |                          |          |                            |
| 1418632_at               | Ube2h       | 4.55E-03 | -1.70                 |                          |          |                            |
| 1422119_at               | Rab5b       | 2.90E-02 | -1.70                 |                          |          |                            |
| 1424621_at               | Krcc1       | 2.75E-03 | -1.70                 |                          |          |                            |
| 1420931_at               | Mapk8       | 9.52E-03 | -1.70                 |                          |          |                            |
| 1456145_at               | Dleu2       | 1.59E-02 | -1.70                 |                          |          |                            |
| 1417765_a_at             | Amy1        | 3.63E-02 | -1.70                 | n/p                      |          |                            |
| 1427580_a_at             | Rian        | 4.63E-02 | -1.70                 | n/p                      |          |                            |
| 1435325_at               | Usp46       | 3.99E-02 | -1.71                 |                          |          |                            |
| 1420980_at               | Pak1        | 2.65E-02 | -1.71                 | 209615_s_at              | 1.73E-02 | -1.59                      |
| 1420849_at               | Crnk1l1     | 1.10E-03 | -1.71                 |                          |          |                            |
| 1437500_at               | Noc3l       | 1.42E-02 | -1.71                 |                          |          |                            |
| 1452862_at               | Rreb1       | 4.75E-02 | -1.71                 |                          |          |                            |
| 1445521_at               | Elavl1      | 9.88E-04 | -1.71                 |                          |          |                            |
| 1427565_a_at             | Abcc5       | 2.61E-02 | -1.71                 |                          |          |                            |
| 1423861_at               | Plekhf2     | 9.68E-03 | -1.71                 |                          |          |                            |
| 1416034_at               | Cd24a       | 5.91E-03 | -1.71                 | n/p                      |          |                            |
| 1418823_at               | Arf6        | 1.69E-02 | -1.71                 |                          |          |                            |
| 1437081_at               | Timp2       | 5.12E-05 | -1.72                 |                          |          |                            |
| 1428523_at               | Lphn3       | 3.23E-02 | -1.72                 | 209867_s_at              | 3.36E-02 | -2.08                      |
| 1420839_at               | Plekha3     | 6.87E-03 | -1.72                 | n/p                      |          |                            |
| 1438661_a_at             | Arf2        | 3.08E-02 | -1.72                 | n/p                      |          |                            |
| 1440489_at               | Zbtb46      | 2.14E-03 | -1.72                 |                          |          |                            |
| 1425181_at               | Sgip1       | 3.00E-02 | -1.73                 | n/p                      |          |                            |
| 1427963_s_at             | Rdh9        | 2.32E-02 | -1.73                 | n/p                      |          |                            |
| 1448510_at               | Efna1       | 8.23E-03 | -1.73                 |                          |          |                            |
| 1455886_at               | Cbl         | 1.40E-02 | -1.73                 |                          |          |                            |
| 1433477_at               | Abr         | 6.59E-03 | -1.73                 |                          |          |                            |
| 1438069_a_at             | Rbm5        | 3.63E-02 | -1.73                 |                          |          |                            |
| 1417811_at               | Slc24a6     | 2.61E-02 | -1.73                 |                          |          |                            |
| 1422192_at               | Gja5        | 1.96E-03 | -1.73                 |                          |          |                            |
| 1435249_at               | Btaf1       | 1.67E-02 | -1.73                 |                          |          |                            |
| 1417517_at               | Plagl2      | 7.05E-03 | -1.73                 |                          |          |                            |
| 1453741_x_at             | Angel2      | 1.35E-02 | -1.74                 |                          |          |                            |
| 1426498_at               | Kdm5c       | 4.58E-03 | -1.74                 |                          |          |                            |
| 1419073_at               | Tmeff2      | 2.76E-02 | -1.74                 | n/p                      |          |                            |
| 1427048_at               | Smo         | 2.97E-02 | -1.74                 |                          |          |                            |
| 1446990_at               | Nfia        | 2.43E-02 | -1.74                 | n/p                      |          |                            |
| 1441693_at               | Adamts3     | 3.95E-02 | -1.74                 |                          |          |                            |
| 1455412_at               | Sfmbt1      | 3.90E-02 | -1.74                 |                          |          |                            |
| 1421194_at               | Itga4       | 1.32E-02 | -1.75                 |                          |          |                            |
| 1453622_s_at             | Milt3       | 1.50E-03 | -1.75                 |                          |          |                            |
| 1433956_at               | Cdh5        | 4.38E-02 | -1.75                 | 204677_at                | 4.20E-02 | -5.88                      |
| 1449948_at               | Ero1lb      | 2.50E-02 | -1.75                 |                          |          |                            |
| 1425597_a_at             | Qk          | 2.76E-02 | -1.75                 | n/p                      |          |                            |
| 1441200_at               | Klf3        | 4.60E-02 | -1.75                 |                          |          |                            |
| 1435818_at               | Klhl15      | 6.17E-03 | -1.75                 | n/p                      |          |                            |
| 1438070_at               | Phf3        | 4.52E-03 | -1.75                 |                          |          |                            |
| 1454631_at               | Gtf2a1      | 1.23E-02 | -1.76                 |                          |          |                            |
| 1417396_at               | Podxl       | 1.17E-02 | -1.76                 | 201578_at                | 2.30E-03 | -2.70                      |
| 1420896_at               | Snap23      | 2.09E-02 | -1.76                 |                          |          |                            |
| 1421504_at               | Sp4         | 7.79E-03 | -1.76                 |                          |          |                            |
| 1423675_at               | Usp1        | 2.43E-02 | -1.76                 |                          |          |                            |
| 1424030_at               | Grhl1       | 1.55E-02 | -1.76                 | n/p                      |          |                            |
| 1425466_at               | Senp2       | 1.81E-02 | -1.77                 |                          |          |                            |
| 1451716_at               | Mafb        | 2.19E-02 | -1.77                 |                          |          |                            |
| 1416211_a_at             | Ptn         | 1.26E-02 | -1.77                 | 209466_x_at              | 3.99E-03 | -1.64                      |

| Probe Set<br>Mouse Array | Gene Symbol | p-value  | Fold change<br>Het/WT | Probe Set<br>Human Array | p-value  | Fold change<br>DDS/Control |
|--------------------------|-------------|----------|-----------------------|--------------------------|----------|----------------------------|
| 1437079_at               | Slc18a2     | 4.53E-03 | -1.77                 |                          |          |                            |
| 1453771_at               | Gulp1       | 1.83E-02 | -1.77                 |                          |          |                            |
| 1425368_a_at             | Numb        | 3.44E-02 | -1.77                 |                          |          |                            |
| 1416702_at               | Serpini1    | 1.59E-02 | -1.78                 |                          |          |                            |
| 1450731_s_at             | Tnfrsf21    | 2.21E-02 | -1.78                 |                          |          |                            |
| 1429649_at               | Slc35a3     | 4.20E-02 | -1.78                 |                          |          |                            |
| 1417430_at               | Cdr2        | 8.14E-03 | -1.78                 |                          |          |                            |
| 1417297_at               | Itrp3       | 1.20E-02 | -1.78                 |                          |          |                            |
| 1435635_at               | Pcmtd1      | 4.37E-03 | -1.78                 | n/p                      |          |                            |
| 1422135_at               | Zfp146      | 1.66E-02 | -1.79                 | n/p                      |          |                            |
| 1440009_at               | Olf78       | 1.66E-02 | -1.79                 | n/p                      |          |                            |
| 1440681_at               | Chrna7      | 1.76E-02 | -1.79                 |                          |          |                            |
| 1427672_a_at             | Kdm6a       | 2.22E-03 | -1.79                 |                          |          |                            |
| 1434629_at               | Zbtb26      | 4.29E-02 | -1.79                 | n/p                      |          |                            |
| 1416162_at               | Rad21       | 5.93E-03 | -1.79                 | 200607_s_at              | 1.48E-02 | -1.54                      |
| 1435742_at               | Smek1       | 4.95E-02 | -1.79                 |                          |          |                            |
| 1441772_at               | P2rx4       | 2.61E-02 | -1.79                 |                          |          |                            |
| 1445027_at               | Cdr2l       | 2.56E-02 | -1.80                 |                          |          |                            |
| 1451569_at               | Nr2c2       | 8.14E-03 | -1.80                 |                          |          |                            |
| 1460062_at               | Plekhh2     | 1.83E-02 | -1.80                 | n/p                      |          |                            |
| 1455121_at               | Lcor        | 1.90E-02 | -1.80                 | n/p                      |          |                            |
| 1430747_at               | Pqlc1       | 2.28E-03 | -1.80                 |                          |          |                            |
| 1452411_at               | Lrrc1       | 7.12E-03 | -1.80                 | 218816_at                | 1.73E-02 | -2.00                      |
| 1420909_at               | Vegfa       | 2.66E-03 | -1.81                 |                          |          |                            |
| 1429274_at               | Lypd6b      | 4.61E-02 | -1.81                 | n/p                      |          |                            |
| 1449551_at               | Myo1c       | 5.30E-03 | -1.81                 |                          |          |                            |
| 1456494_a_at             | Trim30      | 1.92E-02 | -1.81                 | n/p                      |          |                            |
| 1417595_at               | Meox1       | 1.03E-02 | -1.81                 |                          |          |                            |
| 1450437_a_at             | Ncam1       | 4.36E-02 | -1.81                 | 212843_at                | 3.12E-03 | -2.22                      |
| 1449682_s_at             | Tubb2b      | 3.21E-02 | -1.81                 |                          |          |                            |
| 1425008_a_at             | Ifi203      | 4.42E-03 | -1.81                 | n/p                      |          |                            |
| 1442223_at               | Enah        | 1.52E-02 | -1.81                 |                          |          |                            |
| 1421622_a_at             | Rapgef4     | 7.56E-03 | -1.82                 |                          |          |                            |
| 1456975_at               | Taok1       | 5.61E-03 | -1.82                 |                          |          |                            |
| 1418020_s_at             | Cpd         | 4.82E-02 | -1.82                 |                          |          |                            |
| 1429778_at               | Optn        | 2.90E-02 | -1.83                 | 202073_at                | 5.80E-03 | -1.75                      |
| 1426720_at               | Apbb2       | 8.84E-03 | -1.83                 |                          |          |                            |
| 1429233_at               | Sept11      | 1.10E-02 | -1.83                 |                          |          |                            |
| 1424180_a_at             | Med24       | 4.85E-02 | -1.83                 |                          |          |                            |
| 1448375_at               | Tm9sf3      | 3.16E-02 | -1.83                 |                          |          |                            |
| 1421702_at               | Rdh1        | 2.91E-03 | -1.84                 | n/p                      |          |                            |
| 1422264_s_at             | Klf9        | 3.86E-03 | -1.84                 |                          |          |                            |
| 1427579_at               | Rhbdl3      | 1.46E-02 | -1.84                 | n/p                      |          |                            |
| 1434178_at               | Mil3        | 1.78E-02 | -1.84                 | n/p                      |          |                            |
| 1437387_at               | Susd5       | 3.13E-02 | -1.84                 |                          |          |                            |
| 1452492_a_at             | Slc37a2     | 4.14E-02 | -1.84                 | n/p                      |          |                            |
| 1440065_at               | Polr2j      | 4.74E-02 | -1.84                 |                          |          |                            |
| 1425504_at               | Mylk        | 2.15E-02 | -1.84                 | 202555_s_at              | 3.26E-03 | -1.89                      |
| 1426226_at               | Dyrk1a      | 1.83E-02 | -1.85                 |                          |          |                            |
| 1451060_at               | Gpr146      | 1.00E-02 | -1.85                 | n/p                      |          |                            |
| 1437638_at               | Srrm2       | 2.15E-02 | -1.85                 |                          |          |                            |
| 1417172_at               | Ube2l6      | 1.68E-02 | -1.85                 |                          |          |                            |
| 1418762_at               | Cd55        | 4.58E-02 | -1.85                 |                          |          |                            |
| 1458381_at               | Clic5       | 2.45E-03 | -1.86                 |                          |          |                            |
| 1458870_x_at             | Mycbp2      | 2.25E-02 | -1.86                 |                          |          |                            |
| 1450512_at               | Ntn4        | 1.07E-03 | -1.86                 | n/p                      |          |                            |
| 1460717_at               | Tspyl1      | 1.07E-02 | -1.86                 |                          |          |                            |
| 1439035_at               | Zfp322a     | 4.41E-02 | -1.86                 | n/p                      |          |                            |
| 1418471_at               | Pgf         | 1.65E-02 | -1.87                 |                          |          |                            |
| 1444141_at               | Snx13       | 3.89E-02 | -1.87                 |                          |          |                            |
| 1436961_at               | Hspa12a     | 1.38E-04 | -1.87                 |                          |          |                            |
| 1450403_at               | Stat2       | 5.60E-03 | -1.87                 |                          |          |                            |
| 1428799_at               | Lca5        | 3.99E-03 | -1.87                 | n/p                      |          |                            |
| 1440868_at               | Gabpb2      | 2.07E-02 | -1.88                 | n/p                      |          |                            |
| 1421333_a_at             | Mynn        | 4.64E-04 | -1.88                 |                          |          |                            |
| 1451691_at               | Ednra       | 3.70E-02 | -1.88                 | 204464_s_at              | 4.60E-02 | -3.70                      |
| 1455857_a_at             | Rab2b       | 6.42E-03 | -1.88                 | n/p                      |          |                            |
| 1427146_at               | Atpgd1      | 2.85E-02 | -1.88                 | n/p                      |          |                            |
| 1426259_at               | Pank3       | 2.75E-02 | -1.88                 |                          |          |                            |
| 1420906_at               | Cd2ap       | 8.85E-03 | -1.89                 |                          |          |                            |

| Probe Set<br>Mouse Array | Gene Symbol | p-value  | Fold change<br>Het/WT | Probe Set<br>Human Array | p-value  | Fold change<br>DDS/Control |
|--------------------------|-------------|----------|-----------------------|--------------------------|----------|----------------------------|
| 1424101_at               | Hnrnp1      | 1.13E-02 | -1.89                 |                          |          |                            |
| 1449113_at               | Gpbp11      | 4.04E-02 | -1.89                 |                          |          |                            |
| 1453267_at               | Zfx3        | 2.58E-03 | -1.90                 |                          |          |                            |
| 1438033_at               | Tef         | 8.20E-03 | -1.90                 |                          |          |                            |
| 1426208_x_at             | Plagl1      | 5.82E-03 | -1.91                 |                          |          |                            |
| 1423089_at               | Tmod3       | 9.00E-04 | -1.92                 |                          |          |                            |
| 1420976_at               | Man1a2      | 1.74E-02 | -1.92                 |                          |          |                            |
| 1427933_at               | Vps33b      | 1.56E-02 | -1.93                 |                          |          |                            |
| 1450124_a_at             | Atp2a3      | 1.86E-02 | -1.93                 |                          |          |                            |
| 1424176_a_at             | Anxa4       | 4.77E-04 | -1.94                 | 201302_at                | 4.31E-02 | -1.72                      |
| 1424653_at               | Tspan15     | 2.02E-02 | -1.94                 |                          |          |                            |
| 1420944_at               | Zfp185      | 2.02E-02 | -1.94                 | n/p                      |          |                            |
| 1415944_at               | Sdc1        | 4.05E-03 | -1.94                 |                          |          |                            |
| 1437208_at               | Sept10      | 3.95E-02 | -1.95                 |                          |          |                            |
| 1444075_at               | Filip1      | 1.50E-03 | -1.95                 | n/p                      |          |                            |
| 1427711_a_at             | Ceacam1     | 6.41E-04 | -1.95                 |                          |          |                            |
| 1455747_at               | Ggt5        | 2.38E-02 | -1.95                 |                          |          |                            |
| 1417014_at               | Hspb8       | 5.28E-03 | -1.96                 |                          |          |                            |
| 1441266_at               | Strn3       | 1.54E-02 | -1.96                 |                          |          |                            |
| 1450224_at               | Col4a3      | 8.35E-03 | -1.96                 | 222073_at                | 1.40E-02 | -1.67                      |
| 1420928_at               | St6gal1     | 1.83E-02 | -1.97                 |                          |          |                            |
| 1457209_at               | Ddhd2       | 4.63E-02 | -1.97                 |                          |          |                            |
| 1434407_at               | Srgap2      | 1.11E-02 | -1.98                 |                          |          |                            |
| 1448423_at               | Tmed4       | 3.87E-02 | -1.98                 | n/p                      |          |                            |
| 1450125_at               | Gata5       | 4.52E-02 | -1.98                 | n/p                      |          |                            |
| 1452328_s_at             | Pja2        | 6.06E-03 | -1.99                 |                          |          |                            |
| 1426641_at               | Trib2       | 2.14E-03 | -1.99                 | 202479_s_at              | 2.93E-02 | -1.50                      |
| 1421271_at               | Sh3rf1      | 2.82E-02 | -1.99                 | n/p                      |          |                            |
| 1422009_at               | Atp1b2      | 1.30E-02 | -1.99                 |                          |          |                            |
| 1447415_at               | Bdp1        | 3.56E-02 | -2.00                 | n/p                      |          |                            |
| 1441096_at               | Tusc5       | 3.20E-02 | -2.00                 | n/p                      |          |                            |
| 1459331_at               | Surf6       | 1.56E-02 | -2.01                 | n/p                      |          |                            |
| 1431999_at               | Polr3f      | 2.19E-03 | -2.01                 |                          |          |                            |
| 1433756_at               | S100pbbp    | 6.89E-03 | -2.01                 |                          |          |                            |
| 1421954_at               | Crkl        | 3.91E-02 | -2.01                 |                          |          |                            |
| 1422975_at               | Mme         | 4.76E-02 | -2.01                 | 203435_s_at              | 1.11E-02 | -3.22                      |
| 1435749_at               | Gda         | 9.53E-03 | -2.02                 | n/p                      |          |                            |
| 1420923_at               | Usp9x       | 4.00E-02 | -2.02                 |                          |          |                            |
| 1448069_at               | Tm4sf1      | 1.66E-02 | -2.04                 | 215034_s_at              | 9.82E-04 | -2.86                      |
| 1456721_at               | Thsd7a      | 1.64E-02 | -2.04                 |                          |          |                            |
| 1433828_at               | Atp8a1      | 1.02E-03 | -2.05                 |                          |          |                            |
| 1430177_at               | Ube2b       | 6.76E-03 | -2.05                 |                          |          |                            |
| 1418911_s_at             | Acs14       | 1.04E-03 | -2.05                 |                          |          |                            |
| 1453721_a_at             | Slc31a2     | 2.64E-03 | -2.05                 |                          |          |                            |
| 1433804_at               | Jak1        | 2.51E-02 | -2.05                 |                          |          |                            |
| 1426960_a_at             | Fa2h        | 2.98E-02 | -2.06                 | 219429_at                | 2.74E-02 | -1.96                      |
| 1460509_at               | B3galt1     | 3.25E-02 | -2.06                 |                          |          |                            |
| 1434742_s_at             | Aifm3       | 7.32E-04 | -2.07                 | n/p                      |          |                            |
| 1422528_a_at             | Zfp3611     | 2.05E-02 | -2.07                 |                          |          |                            |
| 1420942_s_at             | Rgs5        | 1.15E-02 | -2.07                 | 209070_s_at              | 8.10E-04 | -4.35                      |
| 1430291_at               | Dock5       | 1.72E-03 | -2.07                 |                          |          |                            |
| 1427201_at               | Mustn1      | 5.15E-04 | -2.08                 | n/p                      |          |                            |
| 1448607_at               | Nampt       | 7.21E-03 | -2.08                 |                          |          |                            |
| 1453201_at               | Rassf10     | 1.88E-02 | -2.09                 | n/p                      |          |                            |
| 1454734_at               | Lef1        | 7.23E-03 | -2.09                 |                          |          |                            |
| 1418643_at               | Tspan13     | 1.48E-03 | -2.10                 |                          |          |                            |
| 1444924_at               | N4bp2l2     | 2.75E-02 | -2.10                 |                          |          |                            |
| 1438327_at               | Zfp385b     | 1.87E-02 | -2.11                 | n/p                      |          |                            |
| 1456080_a_at             | Serinc3     | 1.14E-02 | -2.11                 |                          |          |                            |
| 1444347_at               | Mgat4a      | 1.73E-02 | -2.12                 |                          |          |                            |
| 1438540_at               | Col25a1     | 7.16E-04 | -2.14                 | n/p                      |          |                            |
| 1436891_at               | Usp15       | 2.42E-02 | -2.14                 |                          |          |                            |
| 1421845_at               | Golph3      | 3.21E-03 | -2.15                 |                          |          |                            |
| 1436833_x_at             | Ttll1       | 2.79E-02 | -2.16                 |                          |          |                            |
| 1443719_x_at             | Ddx42       | 6.12E-03 | -2.16                 |                          |          |                            |
| 1453760_at               | Mier1       | 1.50E-02 | -2.17                 | n/p                      |          |                            |
| 1438055_at               | Rarres1     | 3.12E-02 | -2.17                 | 221872_at                | 4.63E-04 | -2.56                      |
| 1427328_a_at             | Clasp2      | 4.48E-03 | -2.17                 |                          |          |                            |
| 1429538_a_at             | Sfrs18      | 1.57E-02 | -2.18                 |                          |          |                            |
| 1423554_at               | Ggcx        | 2.54E-03 | -2.19                 |                          |          |                            |



| Probe Set<br>Mouse Array | Gene Symbol | p-value  | Fold change<br>Het/WT | Probe Set<br>Human Array | p-value  | Fold change<br>DDS/Control |
|--------------------------|-------------|----------|-----------------------|--------------------------|----------|----------------------------|
| 1425863_a_at             | Ptpro       | 1.46E-02 | -2.20                 |                          |          |                            |
| 1434474_at               | Abca5       | 2.65E-03 | -2.22                 |                          |          |                            |
| 1426314_at               | Ednrb       | 4.66E-03 | -2.23                 |                          |          |                            |
| 1450821_at               | Kat2b       | 1.11E-02 | -2.24                 |                          |          |                            |
| 1419380_at               | Zfp423      | 4.51E-03 | -2.25                 | n/p                      |          |                            |
| 1416862_at               | Stam        | 2.21E-02 | -2.25                 |                          |          |                            |
| 1438081_at               | Mcc         | 1.62E-02 | -2.25                 |                          |          |                            |
| 1455496_at               | Pfas        | 1.41E-02 | -2.28                 |                          |          |                            |
| 1429105_at               | Dlgap1      | 2.22E-02 | -2.28                 |                          |          |                            |
| 1449310_at               | Ptger2      | 1.59E-02 | -2.29                 |                          |          |                            |
| 1434109_at               | Sh3bgrl2    | 5.21E-03 | -2.30                 | n/p                      |          |                            |
| 1418753_at               | Gfpt2       | 1.73E-03 | -2.31                 |                          |          |                            |
| 1433707_at               | Gabra4      | 2.18E-02 | -2.32                 |                          |          |                            |
| 1436866_at               | Efna5       | 2.93E-03 | -2.32                 |                          |          |                            |
| 1455188_at               | Ephb1       | 1.94E-03 | -2.32                 |                          |          |                            |
| 1426218_at               | Gccci1      | 1.56E-03 | -2.33                 | n/p                      |          |                            |
| 1456121_at               | Cep97       | 4.02E-02 | -2.33                 |                          |          |                            |
| 1428820_at               | Mapre1      | 3.73E-03 | -2.35                 |                          |          |                            |
| 1421102_a_at             | Vamp3       | 1.15E-02 | -2.36                 |                          |          |                            |
| 1420695_at               | Dach1       | 1.33E-03 | -2.37                 |                          |          |                            |
| 1421851_at               | Mtap1b      | 4.51E-02 | -2.38                 | n/p                      |          |                            |
| 1423290_at               | Hyou1       | 3.72E-02 | -2.39                 |                          |          |                            |
| 1435292_at               | Tbc1d4      | 1.85E-02 | -2.39                 |                          |          |                            |
| 1418250_at               | Arl4d       | 4.42E-02 | -2.40                 | 203586_s_at              | 3.16E-02 | -1.56                      |
| 1425620_at               | Tgfb3       | 1.22E-02 | -2.40                 |                          |          |                            |
| 1430463_a_at             | Sncaip      | 5.57E-03 | -2.41                 |                          |          |                            |
| 1451257_at               | Acsf6       | 2.14E-02 | -2.41                 |                          |          |                            |
| 1425329_a_at             | Cyb5r3      | 2.87E-02 | -2.43                 |                          |          |                            |
| 1426296_at               | Rad52       | 8.18E-03 | -2.44                 |                          |          |                            |
| 1422556_at               | Gna13       | 2.92E-02 | -2.44                 |                          |          |                            |
| 1425071_s_at             | Ntrk3       | 4.94E-03 | -2.45                 |                          |          |                            |
| 1423433_at               | Trove2      | 3.49E-02 | -2.46                 |                          |          |                            |
| 1439026_at               | Trpm3       | 2.78E-02 | -2.47                 |                          |          |                            |
| 1420772_a_at             | Tsc22d3     | 3.57E-02 | -2.47                 |                          |          |                            |
| 1423025_a_at             | Schip1      | 1.59E-03 | -2.47                 |                          |          |                            |
| 1450582_at               | H2-Q5       | 1.65E-02 | -2.50                 | n/p                      |          |                            |
| 1447264_at               | Rab11fip1   | 6.59E-03 | -2.51                 |                          |          |                            |
| 1425208_at               | Lbh         | 3.25E-02 | -2.53                 | 221011_s_at              | 3.88E-02 | -2.04                      |
| 1446331_at               | Ptgfr       | 2.53E-02 | -2.55                 |                          |          |                            |
| 1415997_at               | Txnip       | 2.79E-02 | -2.56                 |                          |          |                            |
| 1434469_at               | Otud4       | 1.90E-02 | -2.58                 |                          |          |                            |
| 1436279_at               | Slc26a7     | 1.97E-02 | -2.61                 | n/p                      |          |                            |
| 1437492_at               | Mkx         | 1.49E-02 | -2.62                 | n/p                      |          |                            |
| 1437074_at               | Snx5        | 1.97E-02 | -2.62                 |                          |          |                            |
| 1421064_at               | Mpp5        | 2.12E-03 | -2.63                 |                          |          |                            |
| 1428392_at               | Rassf2      | 1.30E-02 | -2.65                 |                          |          |                            |
| 1435998_at               | Ccnb1ip1    | 9.29E-04 | -2.76                 |                          |          |                            |
| 1438884_at               | Shisa3      | 2.36E-03 | -2.76                 | n/p                      |          |                            |
| 1421344_a_at             | Jub         | 2.95E-02 | -2.76                 | n/p                      |          |                            |
| 1423495_at               | Decr2       | 4.35E-02 | -2.79                 |                          |          |                            |
| 1448414_at               | Rad1        | 4.47E-02 | -2.82                 |                          |          |                            |
| 1431804_a_at             | Sp3         | 2.96E-02 | -2.83                 |                          |          |                            |
| 1451846_at               | Neb1        | 1.00E-02 | -2.97                 |                          |          |                            |
| 1450309_at               | Astn2       | 1.28E-02 | -3.00                 |                          |          |                            |
| 1453177_at               | Snx31       | 3.68E-02 | -3.06                 | n/p                      |          |                            |
| 1453524_at               | Kif5b       | 4.98E-02 | -3.07                 |                          |          |                            |
| 1440246_at               | Lass6       | 2.08E-04 | -3.15                 | 212442_s_at              | 1.33E-02 | -1.96                      |
| 1435126_at               | Dusp15      | 1.52E-02 | -3.18                 | n/p                      |          |                            |
| 1428283_at               | Cyp2s1      | 1.54E-02 | -3.24                 | n/p                      |          |                            |
| 1443002_at               | Zfr         | 3.80E-02 | -3.27                 |                          |          |                            |
| 1453826_at               | Pard3b      | 5.28E-05 | -3.28                 | n/p                      |          |                            |
| 1439101_at               | Mylk3       | 2.16E-02 | -3.41                 |                          |          |                            |
| 1428759_s_at             | Ccdc49      | 2.70E-02 | -3.51                 |                          |          |                            |
| 1422010_at               | Tlr7        | 6.37E-03 | -3.52                 |                          |          |                            |
| 1454791_a_at             | Rbbp4       | 8.51E-03 | -4.04                 |                          |          |                            |
| 1422837_at               | Scel        | 1.15E-02 | -5.43                 |                          |          |                            |
| 1436319_at               | Sulf1       | 5.87E-08 | -8.45                 | 212354_at                | 5.70E-05 | -4.35                      |
| 1436850_at               | Creg2       | 1.54E-02 | -8.73                 | n/p                      |          |                            |

n/p: genes not present on human array (HG U133A 2.0); empty cells: genes are not differentially expressed in human samples

**Table S3:** Urine albumin/creatinine ratio in *Sulf* mutant mice

| <b>Genotype</b>                                                                                                        | <b>Age<br/>(months)</b>                                   | <b>Alb/Crea<br/>(mg/mmol)</b> |
|------------------------------------------------------------------------------------------------------------------------|-----------------------------------------------------------|-------------------------------|
| <i>Sulf1</i> <sup>+/-</sup> ; <i>Sulf2</i> <sup>+/+</sup><br><i>Sulf1</i> <sup>+/-</sup> ; <i>Sulf2</i> <sup>+/-</sup> | 9                                                         | 1.7                           |
|                                                                                                                        | 2                                                         | 1.9                           |
|                                                                                                                        | 7                                                         | 1.8                           |
|                                                                                                                        | 7                                                         | 1.7                           |
|                                                                                                                        | 7                                                         | 1.4                           |
|                                                                                                                        | 7                                                         | 1.9                           |
|                                                                                                                        | <i>Sulf1</i> <sup>-/-</sup> ; <i>Sulf2</i> <sup>+/-</sup> | 5.5                           |
| 7                                                                                                                      |                                                           | 1.2                           |
| 8                                                                                                                      |                                                           | 0.8                           |
| 8                                                                                                                      |                                                           | 1.2                           |
| 9                                                                                                                      |                                                           | 1.5                           |
| <i>Sulf1</i> <sup>+/-</sup> ; <i>Sulf2</i> <sup>-/-</sup>                                                              | 7                                                         | 6.0                           |
|                                                                                                                        | 7                                                         | 1.9                           |
|                                                                                                                        | 7                                                         | 8.4                           |
|                                                                                                                        | 9                                                         | 1.8                           |
| <i>Sulf1</i> <sup>-/-</sup> ; <i>Sulf2</i> <sup>-/-</sup>                                                              | 1                                                         | 2.4                           |
|                                                                                                                        | 3                                                         | 3.3                           |
|                                                                                                                        | 5                                                         | 11.5                          |
|                                                                                                                        | 5.5                                                       | 14.1                          |
|                                                                                                                        | 5.5                                                       | 0.9                           |
|                                                                                                                        | 7                                                         | 14.7                          |
|                                                                                                                        | 7                                                         | 14.8                          |
|                                                                                                                        | 7                                                         | 7.0                           |
|                                                                                                                        | 9                                                         | 12.7                          |
